1 **Living to the high extreme: unraveling the composition, structure,**  
2 **and functional insights of bacterial communities thriving in the**  
3 **arsenic-rich Salar de Huasco – Altiplanic ecosystem.**

4

5

6 Castro-Severyn, J<sup>1,±</sup>; Pardo-Esté, C<sup>1,2,±</sup>; Mendez, KN<sup>3</sup>; Fortt, J<sup>1</sup>; Marquez, S<sup>3</sup>; Molina, F<sup>4</sup>;  
7 Castro-Nallar, E<sup>3</sup>; Remonsellez, F<sup>1,5\*</sup> and Saavedra, CP<sup>2\*</sup>.

8

9 <sup>1</sup> Laboratorio de Microbiología Aplicada y Extremófilos, Facultad de Ingeniería y Ciencias  
10 Geológicas, Universidad Católica del Norte, Antofagasta, Chile.

11 <sup>2</sup> Laboratorio de Microbiología Molecular, Facultad de Ciencias de la Vida, Universidad  
12 Andres Bello, Santiago, Chile.

13 <sup>3</sup> Center for Bioinformatics and Integrative Biology, Facultad de Ciencias de la Vida,  
14 Universidad Andres Bello, Santiago, Chile.

15 <sup>4</sup> Sys2Diag, UMR9005 CNRS ALCEDIAG, Montpellier, France

16 <sup>5</sup> Centro de Investigación Tecnológica del Agua en el Desierto-CEITSAZA, Universidad  
17 Católica del Norte, Antofagasta, Chile.

18

19 ± Juan Castro-Severyn and Coral Pardo-Esté have contributed equally to this work. Author  
20 order was determined both by contribution and in order of increasing seniority.

21

22 \*Correspondence: Francisco Remonsellez, [fremonse@ucn.cl](mailto:fremonse@ucn.cl) and Claudia P. Saavedra,  
23 [csaavedra@unab.cl](mailto:csaavedra@unab.cl).

24

25

26 **Running title:** Altiplanic communities living under arsenic stress.

27

28

29 **ABSTRACT**

30 Microbial communities inhabiting extreme environments like Salar de Huasco (SH) are  
31 adapted to thrive while exposed to several abiotic pressures and the presence of toxic  
32 elements like arsenic (As). Hence, we aimed to uncover the role of arsenic in shaping  
33 bacterial composition, structure, and functional potential in five different sites in this  
34 Altiplanic wetland using a shotgun metagenomic approach. The sites exhibit wide gradients  
35 of arsenic (9 to 321 mg/kg), and our results showed highly diverse communities and a clear  
36 dominance exerted by the *Proteobacteria* and *Bacteroidetes* phyla. Functional potential  
37 analyses showed broadly convergent patterns, contrasting with their great taxonomic  
38 variability. Arsenic-related metabolism is different among the five communities, as well as  
39 other functional categories like those related to the CH<sub>4</sub> and S cycles. Particularly, we found  
40 that the distribution and abundance of As-related genes increase, following along the As  
41 concentration gradient. Approximately 75% of the detected genes for As-metabolism  
42 belong to expulsion mechanisms, being *arsJ* and *arsP* pumps related to sites with higher As  
43 concentrations and present almost exclusively in *Proteobacteria*. Furthermore, taxonomic  
44 diversity and functional potential are reflected in the 12 reconstructed high-quality MAGs  
45 (Metagenome Assembled Genomes) belonging to *the Bacteroidetes* (5), *Proteobacteria* (5),  
46 *Cyanobacteria* (1) and *Gemmatimonadota* (1) phyla. We conclude that SH microbial  
47 communities are diverse and possess a broad genetic repertoire to thrive under extreme  
48 conditions, including increasing concentrations of the highly toxic As. Finally, this  
49 environment represents a reservoir of unknown and undescribed microorganisms, with a  
50 great metabolic versatility, which needs further study.

51

52 **KEY WORDS:** Extremophiles, Metagenomics, Arsenic, MAGs, Altiplano.

53

54

55 **IMPORTANCE**

56 Microbial communities inhabiting extreme environments are fundamental for maintaining  
57 the ecosystems; however, little is known about their potential functions and interactions

58 among them. We sampled the microbial communities in Salar de Huasco (SH) in the Chilean  
59 Altiplano, a fragile and complex environment that comprises several stresses. We found  
60 that microbes in SH are taxonomically diverse; nonetheless, their functional potential seems  
61 to have an important convergence degree, suggesting high adaptation levels. Particularly,  
62 arsenic metabolism showed differences associated with increasing concentrations of the  
63 metalloid throughout the area, and it is effectively exerting a clear and significant pressure  
64 over these organisms. Thus, this research's significance is that we described highly  
65 specialized communities thriving in little-explored environments under several pressures,  
66 considered analogous of early Earth and other planets, and can have the potential for  
67 unraveling technologies to face climate change repercussions in many areas of interest.

68

69

## 70 **INTRODUCTION**

71 Extreme environments like high-altitude wetlands select for adaptations in bacterial  
72 communities that enable them to thrive. This particular and fragile environment resemble  
73 life before the oxygenation of Earth and could serve as models for studying life in other  
74 planets. Moreover, microbial communities are critical for maintaining biogeochemical  
75 cycles, particularly in extreme environments where there is little presence of other life  
76 forms. Therefore, microorganisms are crucial for ecosystems' health and functioning (1).  
77 Salar de Huasco (SH), a high-altitude wetland located in the Chilean Altiplano (20°18'18''S;  
78 68°50'22''W, Chile) at 3,800 m.a.s.l. is a Ramsar protected site, considered a hotspot for  
79 microbial life (2,3). This area is labeled as extreme due to very particular confluence of  
80 physicochemical and environmental conditions, like negative water balance, high daily  
81 temperature variation, very arid conditions, high salinity, low atmospheric pressure, high  
82 solar radiation, presence of arsenic, among other stressors (4, 5, 6, 7, 8, 9).

83

84 In high altitude wetlands, arsenic concentration, moisture availability, and salt  
85 concentrations model communities at a small scale (10, 11, 12, 13). The presence of toxic  
86 metal(oids), such as arsenic, is one of the main drivers of microbial communities'

87 composition (14), as an important selection pressure originated from natural geochemical  
88 processes or human activities. Also, previous studies have determined that the presence of  
89 metal(oids) can influence biogeochemical cycles, namely C, N and S, by promoting specific  
90 chemical reactions and the enrichment of chemoautotrophs, for example As(III)-oxidizing  
91 bacteria that can couple this process with nitrate reduction (15, 16, 17); thus, making  
92 relevant to assess the metabolic potential of indigenous microbes and communities. In the  
93 North of Chile, the relationship between volcanism activities and the presence of arsenic is  
94 a known feature, this geological process has been attributed to hydrothermal conditions  
95 such as geysers and fumaroles in the pre-range and high plateau (5). Besides, bacteria that  
96 thrive in these environments exhibit arsenic-related genes, including genes associated with  
97 methylation (ArsM), oxidation (AioAB, ArxAB), and dissimilatory reduction (ArrAB) (18). The  
98 most common resistance mechanism is based on As(III) extrusion from the cell by efflux  
99 pumps, which is commonly coupled with As(V) reduction (19). Thus, making the genes from  
100 the *ars* operon the most abundant arsenic resistance markers; the basic requirements  
101 comprises the arsenite efflux (ArsB, Acr3) and arsenate reductase (ArsC) (20).

102

103 Arsenic is a crucial element for the microbial community composition and  
104 metagenomic approaches have helped to shed some light on this subject. For instance, in  
105 Socompa's stromatolites arsenic resistance is achieved mainly through reduction and  
106 expulsion of As(V) via Acr3 efflux pumps reductases (21, 22). Additionally, others have found  
107 that the presence of arsenic influenced the microbial communities, and the *Rhodococcus*  
108 genus was significantly enriched in elevated levels of the metalloid in groundwater (14).  
109 Furthermore, arsenic mobilization is distributed across a broad phylogenetic lineage in  
110 similar ecosystems, as *arrA* was detected in *Betaproteobacteria*, *Deltaproteobacteria*, and  
111 *Nitrospirae* MAGs (23). Also, although arsenic-related genes are widespread, they are not  
112 universal, in particular As metabolism genes such as *aioA*, *arrA*, *arsM*, *arxA* are less common  
113 in the environment compared with *acr3*, *arsB*, *arsC* and *arsD* (24).

114



115           In this study, we tested different established sites in the SH regarding taxonomic and  
116 functional heterogeneity. We focused on As-related genetic elements as well as other  
117 relevant metabolic functions. Evermore, such analyses enable the identification of relatively  
118 small subsets of markers associated with a particular ecologically important function.  
119 Besides, identifying those and the changes of bacterial communities are potentially useful  
120 bio-indicator for monitoring ecosystem health (25, 26). Therefore, considering the  
121 aforementioned we set up to describe and characterize the composition, structure and  
122 functional potential of bacterial communities from the sediments of five different Salar de  
123 Huasco sites along an arsenic gradient, among other environmental pressures.

124

125

## 126 **RESULTS**

127           The Salar de Huasco comprises an important level of variation (27, 28), evidenced  
128 within a relatively small area (sampled area spans a distance of 5.9 km); including daily  
129 oscillations in a wide range of environmental parameters (temperature and humidity) and  
130 other which vary in spatial gradients, i.e., arsenic and salinity increasing from north to south  
131 (Figure 1) (9). In this context, shotgun metagenomic sequencing of the sediment samples  
132 representing the five SH sites yielded an average of 87.2 million reads (150 bp length) per  
133 sample, with a quality score  $\geq 30$  presented by ~95% of those obtained reads.

134

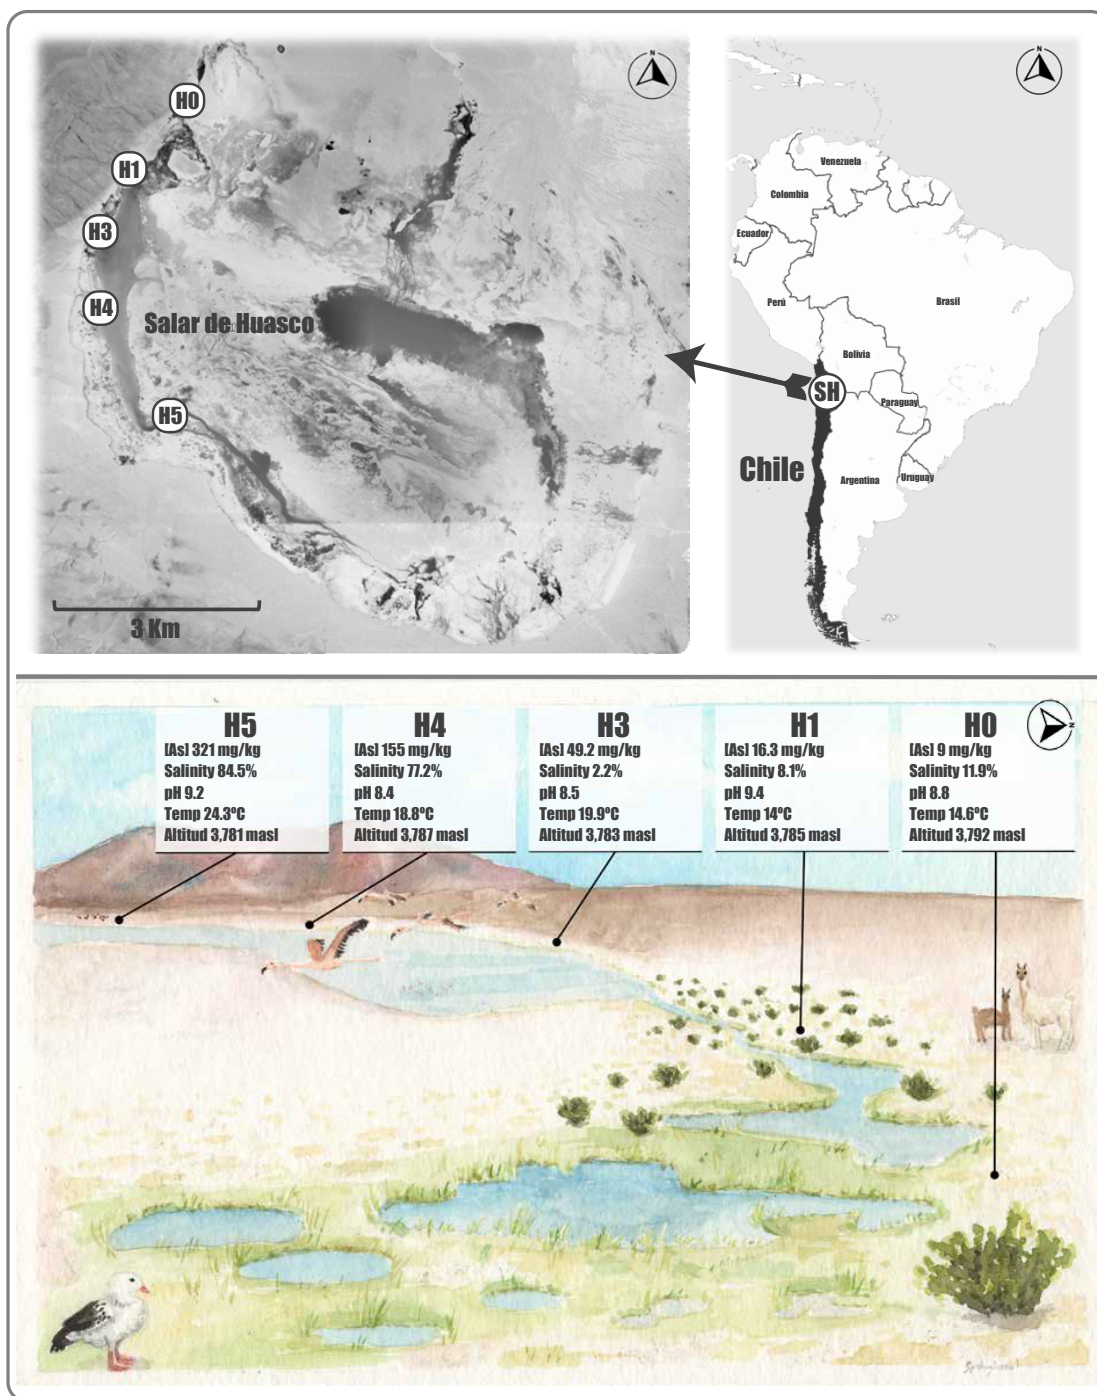

135

136 **Figure 1. Salar de Huasco study area.** Top panel: a map showing the five sampling sites (H0:  
137 20°15'48.8"S - 68°52'28.4"W; H1: 20°16'27.7"S - 68°53'3"W; H3: 20°16'59.2"S -  
138 68°53'16.7"W; H4: 20°17'40.9"S - 68°53'17.3"W and H5: 20°18'37"S - 68°52'42"W)  
139 investigated in this study. SH is located between the 68°47' - 68°54' W and 20°15' - 20°20'  
140 S in the Tarapacá region Northern Chile (Source: Google Earth). Bottom panel: illustration  
141 of the SH landscape seen from the H0 site to the South-West; the signs show some  
142 particular characteristics of each site (according to those reported in Castro-Severyn et al.,  
143 2020 (9)). The painting is the work of the illustrator Florence Gutzwiller @spideryscrawl.

144

### 145 **The bacterial communities of SH are highly heterogeneous and rich in unknown taxa**

146       The contrasting differences presented among the SH sampling sites are reflected by  
147 the taxonomic composition of bacterial communities, which showed contrasting patterns  
148 and variation between sites (Figure 2). Overall, our results indicate that the *Proteobacteria*  
149 and *Bacteroidetes* are the most prevalent phyla in the sampled sediments, which are  
150 particularly enriched in the H3, H4 and H5 communities, accounting together for >60% of  
151 all observed taxa (Figure 2A). In turn, these phyla represent ~50% in the H0 and H1  
152 communities. Interestingly, the H0 site is dominated by the *Cyanobacteria* phylum with a  
153 34% of the total community; also, this community has the highest abundance of *Firmicutes*,  
154 *Patescibacteria* and *Spirochaetes* phyla as well as significantly lower proportion of  
155 *Actinobacteria*. Moreover, H1 community profile presents the highest abundance of  
156 *Chloroflexi*, *Actinobacteria*, *Verrucomicrobia*, *Planctomycetes* and *Acidobacteria* phyla. On  
157 the other hand, H3, H4 and H5 communities are more similar to each other, despite the vast  
158 differences in low-abundance taxa; many of which are exclusively present in only one  
159 community (Supplementary Table S1).

160

161       The most abundant bacteria at the lowest (available) taxonomic rank reflect the  
162 same pattern, with a great abundance of *Proteobacteria* genera *Roseovarius* and  
163 *Desulfotignum* in the H3, H4 and H5 communities (Supplementary Figure S1). Moreover,  
164 *Halomonas*, *Thiobacillus*, *Luteolibacter* and *Truepera* genera are more widespread, while  
165 *Rhodohalobacter*, *Marinobacter*, *Psychroflexus* and *Brumimicrobium* are also concentrated  
166 in H3, H4 and H5. Contrary, H0 and H1 are enriched in *Cyanobacteria* like *Arthrospira* and  
167 three members of the *Chloroplast* order, as well as genera with various metabolism types  
168 such as *Methylibium*, *Hydrogenophaga* and *Desulfomicrobium*. In addition, it is worth  
169 mentioning that from the 3,801 bacterial ASVs detected, 6.5% and 58.3% could not be  
170 classified within any known phylum nor genus respectively. Particularly, *Halomonas* and  
171 *Marinobacter* are culturable bacteria and seem to be recurrent in the SH, as we reported  
172 before (29). Nonetheless, H4 community is by far the most diverse one, according to the

173 Observed, Shannon, Chao and Simpson diversity indices, which were quite heterogeneous  
174 between samples (Supplementary Figure S2). Specifically, the phylogenetic diversity  
175 showed that the H0 community has a higher number of distant taxa regarding the other  
176 communities under study.

177

178 As a whole, the beta diversity analysis shows that the dispersion patterns among the  
179 communities correlates with what was observed in terms of composition. Hence, the  
180 taxonomic composition of H3, H4 and H5 metagenomes are more similar between each  
181 other and distinctive from H0 and H1, producing three very well-defined groups (Figure 2B).  
182 This is contrasting to the obtained alpha diversity results, suggesting that their members  
183 could differ in abundance. Thus, confirming the great level of structure among the  
184 communities, considering the total bacterial abundance and taxa diversity. Moreover, the  
185 distribution of most abundant taxa among the five communities could explain this  
186 segregation. Furthermore, we investigated to what extent the microbial community  
187 structure was explained by the environmental factors and found that many variables exert  
188 a significant influence over the structure and distribution/grouping, among which arsenic  
189 appears to be a main driving force shaping these communities. Besides, salinity along with  
190 arsenic separate the H3, H4 and H5 communities, while H0 and H1 segregation is driven by  
191 altitude and pH respectively. Nonetheless, for the temperature we have to consider that  
192 the observed variation may be the result of the normal daily cycle with respect to the time  
193 when samples were taken.

194

195 The co-occurrence analysis allowed us to infer possible interactions among complex  
196 microbiomes. The network was composed by 112 ASVs having at least one significant  
197 correlation, graphically represented as a link between taxa. Total correlations were 155,  
198 being 115 positive and 40 negatives. Furthermore, the co-occurrence analyses showed  
199 three distinct separated networks within these microbial assembly. However, there is a big  
200 main group that comprises most taxa. As expected, the dominant phyla, *Proteobacteria* and  
201 *Bacteroidetes*, are among the nodes with a highest degree of interactions (Figure 2C). It is

202 worth mentioning that most of the relevant (highly connected) taxa identified in the  
203 networks are little described or studied. Overall, there is the prevalence of direct or indirect  
204 relationships among taxa, and this is suggestive of complementing functions in order to  
205 maintain the ecosystem. Also, there are few negative correlations that would suggest little  
206 niche overlap or competition among taxa.

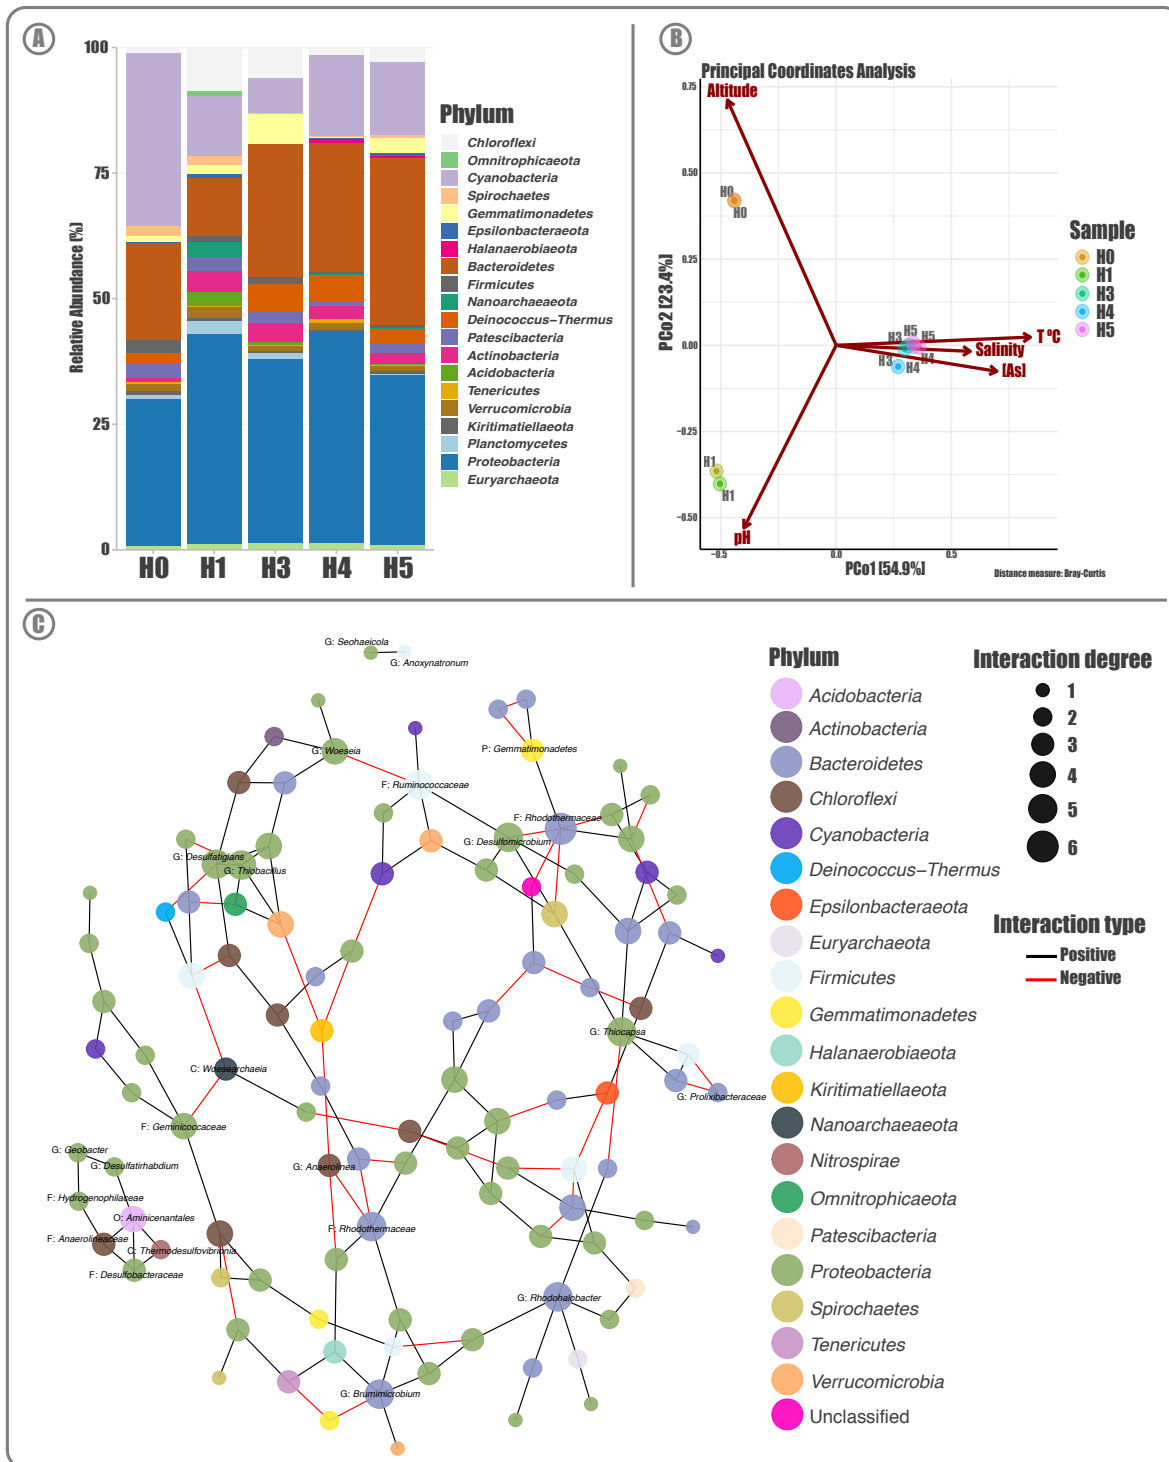

207

208 **Figure 2. Salar de Huasco bacterial communities. A)** Taxonomic composition and relative  
 209 abundance of SH microbial communities in the five studied sites; Stacked-bars show the  
 210 top20 most abundant bacteria at the phylum taxonomic level. **B)** Beta diversity by Principal  
 211 Component Analysis (PCoA) on Hellinger transformed amplicon sequence variant (ASV)  
 212 relative abundances. Each point corresponds to a community from the different sites  
 213 (represented colors), and its relative distance indicates the level of similarity to all other



214 samples. The arrows indicate the explanatory power of the statistically significant  
215 environmental parameters with regards to the observed variation in community  
216 composition. **C)** Co-occurrence network analysis of the SH bacterial communities, the size  
217 of each node (representing ASVs) is proportional to the number of connections (degrees),  
218 the color of the edges connecting nodes represent the interaction type, the node color  
219 indicates the taxonomic affiliation at phylum level and node labels are at the lowest  
220 available taxonomic classification.

221

## 222 **Functional approach of SH communities reveals metabolic specialization**

223 The five SH metagenomes we analyzed represent the surface sediment of 5 different  
224 sites with a great variation in arsenic content (from 9 to 321 mg/Kg). The 337.5 million  
225 quality-controlled reads were co-assembled and yielded a total of 994,545 contigs ( $\geq 1,000$   
226 bp) with 2.38 millions genes, which were used to generate abundance/distributions and  
227 functional profiles of the 5 studied communities (Figure 3; Supplementary Table S2). Of  
228 those contigs, 148,394 ( $\geq 2,500$  bp) were hierarchically clustered to then be profiled by  
229 read-recruitment of the data from the five communities (Figure 3A). The resulting patterns  
230 are highly variable, considering the contigs detection in each metagenome. In particular,  
231 metagenomes from H1 and H5 are the most contrasting ones, as they respectively have  
232 18.78% and 78.40% presence of all available contigs in the SH. Moreover, the rest of the  
233 samples also have diverse percentages of representation (H0: 25.00%; H3: 72.08% and H4:  
234 48.33%), and their clustering by the read recruitment profiles correlates with the taxonomic  
235 profiles presented previously; being H3, H4 and H5 more similar to each other, and H0 and  
236 H1 more distanced from each other and to the others as well. Contrary, the functional  
237 profiles seem to have a higher level of convergence between samples in a broad way (Figure  
238 3B). Furthermore, the more enriched categories (SEED Subsystems 1) are associated with  
239 metabolism (amino acid derivatives, carbohydrates, protein metabolism, DNA metabolism,  
240 cofactor, vitamins, prosthetic groups and pigments) which could be evidence of the needed  
241 versatility and adaptability for bacteria to thrive in these harsh environments. Also, the  
242 stress response, membrane transporter, cell wall and capsule categories, which are related  
243 to the ability to thriving capabilities as well.

244

245           Nonetheless, statistical testing showed that the differences presented by the  
246 metagenomes in most categories were significant (Supplementary Table S3). Particularly,  
247 the five SH communities showed particular differences in some categories such as arsenic  
248 resistance (SEED Subsystems 3), which follows the same tendency previously mentioned;  
249 where H0/H1 metagenomes are more similar regarding H3/H4/H5, with 0.21 - 0.22% and  
250 0.26 - 0.27% of reads recruited by this category, respectively. Other significant categories  
251 among the communities were carbon, nitrogen, and phosphate metabolism; Zinc, Nickel,  
252 Cobalt, Iron and Manganese transport; osmotic stress; circadian clock in *Cyanobacteria* and  
253 the Calvin Benson cycle. Whereas, when assessing the ability of these bacterial communities  
254 to carry out necessary reactions to sustain some biogeochemical cycles, we found that S, N  
255 and CH<sub>4</sub> showed significant scores (MEBS analysis) for all five metagenomes; implying that  
256 the necessary metabolic pathways and machinery is present and with proper completeness  
257 (Supplementary Figure S3). Nevertheless, a wide difference is present in the CH<sub>4</sub> cycle,  
258 which is much more enriched in the H1 and H0 communities; especially in the Methane  
259 oxidation, Methanol, Methanogenesis and *mcrABC* (markers) pathways. Also, a small  
260 decrease in H1 sulfur is also observed.

261



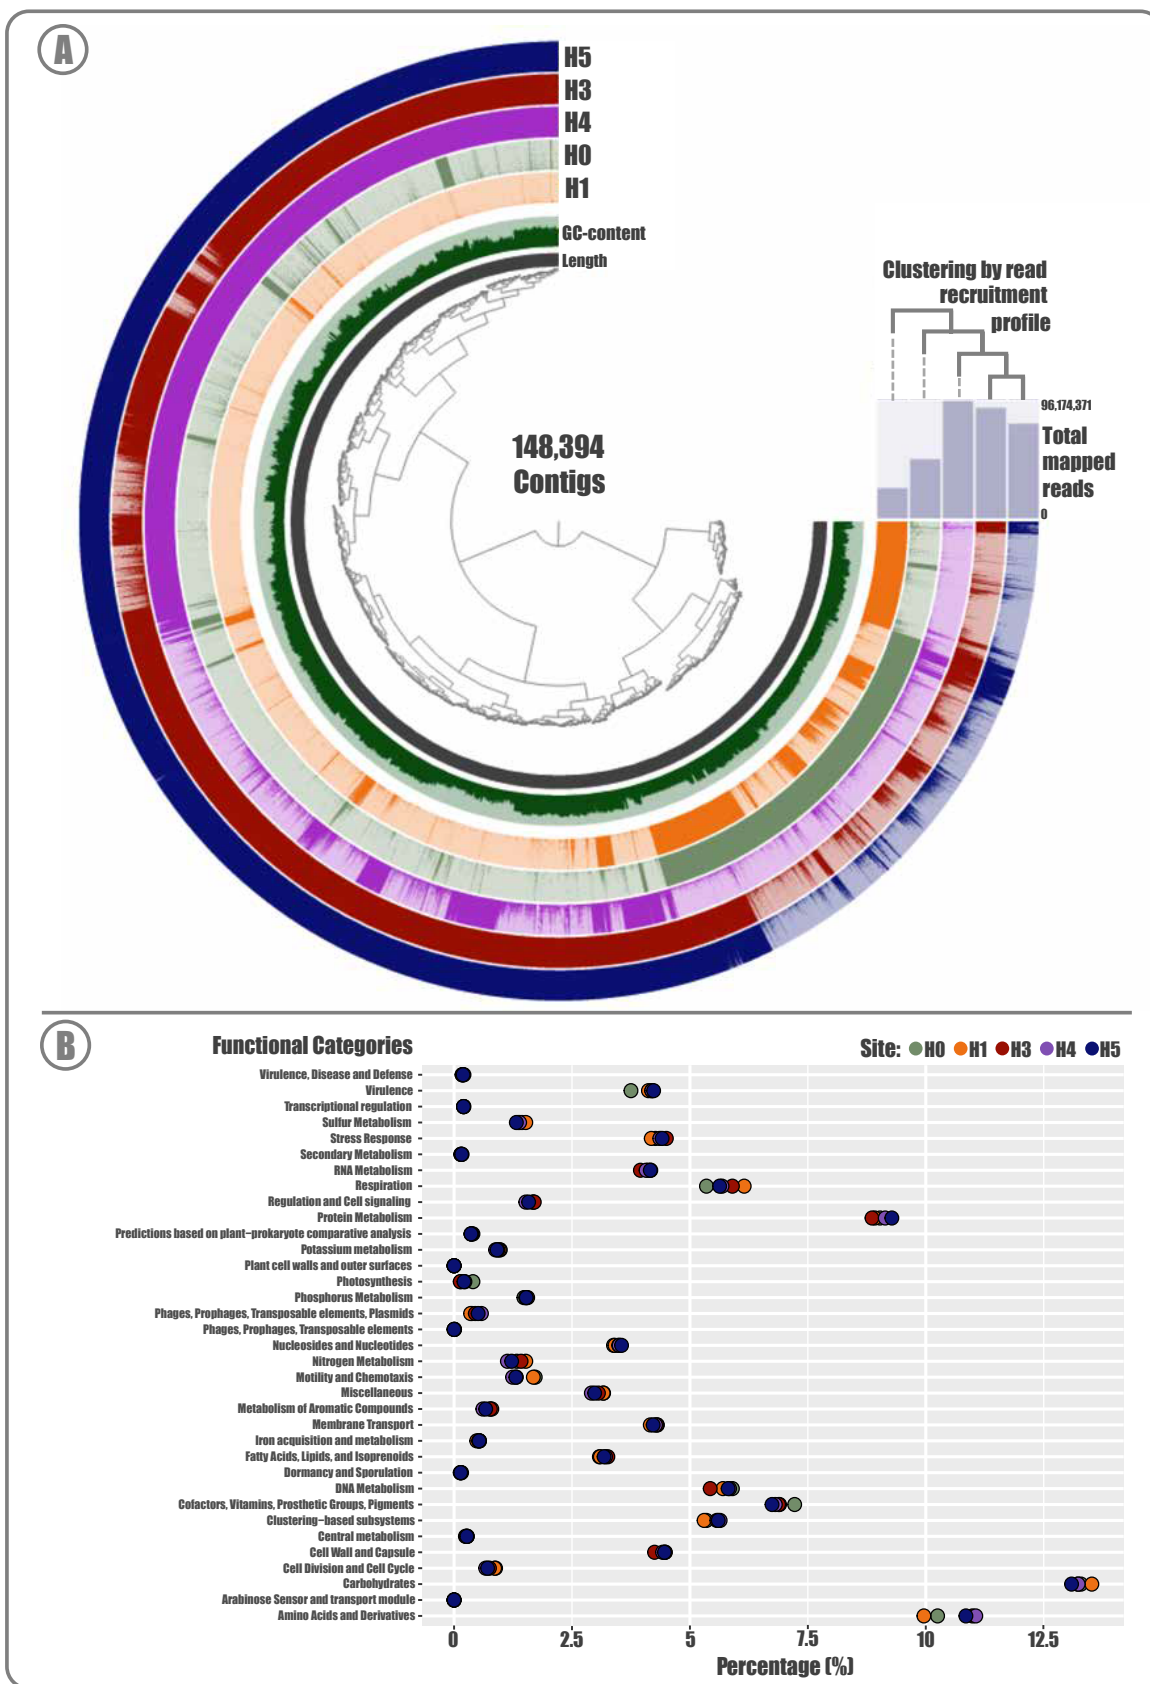

263 **Figure 3. Salar de Huasco metagenomes. A)** Circular map representing the universe of  
264 contigs detected in the five SH sites: the central tree represents the contigs organization on  
265 Ward's linkage with Euclidean distances, the seven circle layers (from bottom-up)  
266 represent, for the corresponding contig: its length, GC-content, and presence on the five  
267 metagenomes. The top-right bars represent the number of mapped reads for the  
268 corresponding metagenome and the dendrogram their clustering by read-recruitment  
269 profile. **B)** Patterns of functional potential for each metagenome, according to the presence  
270 and abundance of the SEED database of metabolic pathways and functions: subsystems at  
271 level 1. The circles represent the percentage value for the corresponding category in each  
272 metagenome (defined by colors).

273

### 274 **Arsenic expulsion is the main mechanism to thrive in the SH**

275 To gain a broader view on the communities' functional potential related to arsenic  
276 metabolism or resistance/tolerance we determined the abundance of the genes belonging  
277 to the known mechanisms (Figure 4). Again, the abundance pattern of these genes  
278 correlates with the observed tendency, being more related those H3, H4 and H5 sites,  
279 distant from H0 and H1. Moreover, although marker genes of arsenic methylation,  
280 reduction, oxidation, respiration, and expulsion mechanisms are present in all sites, most  
281 are significantly more abundant in the H3, H4 and H5 sites. This may be due to the much  
282 higher arsenic concentration in the sediments of these sites. The *arsR* regulator, the *arsC*  
283 reductase and the *acr3* pump were the most abundant ones, which would indicate that the  
284 As(V) reduction and subsequent As(III) expulsion would be the most common strategy used  
285 by the SH inhabitant bacteria. Moreover, *arsM* was also among que most abundant genes,  
286 particularly enriched in the H3, H4 and H5 metagenomes. Whereas, genes related to  
287 oxidation and respiration mechanisms are less abundant and present an interesting  
288 distribution; being those related to oxidation (*aoxA*, *aoxB*, *aiob*) are enriched in H3, H4 and  
289 H5, contrary to those related to respiration (*arrA*, *arxR*) are enriched in H0 and H1.

290

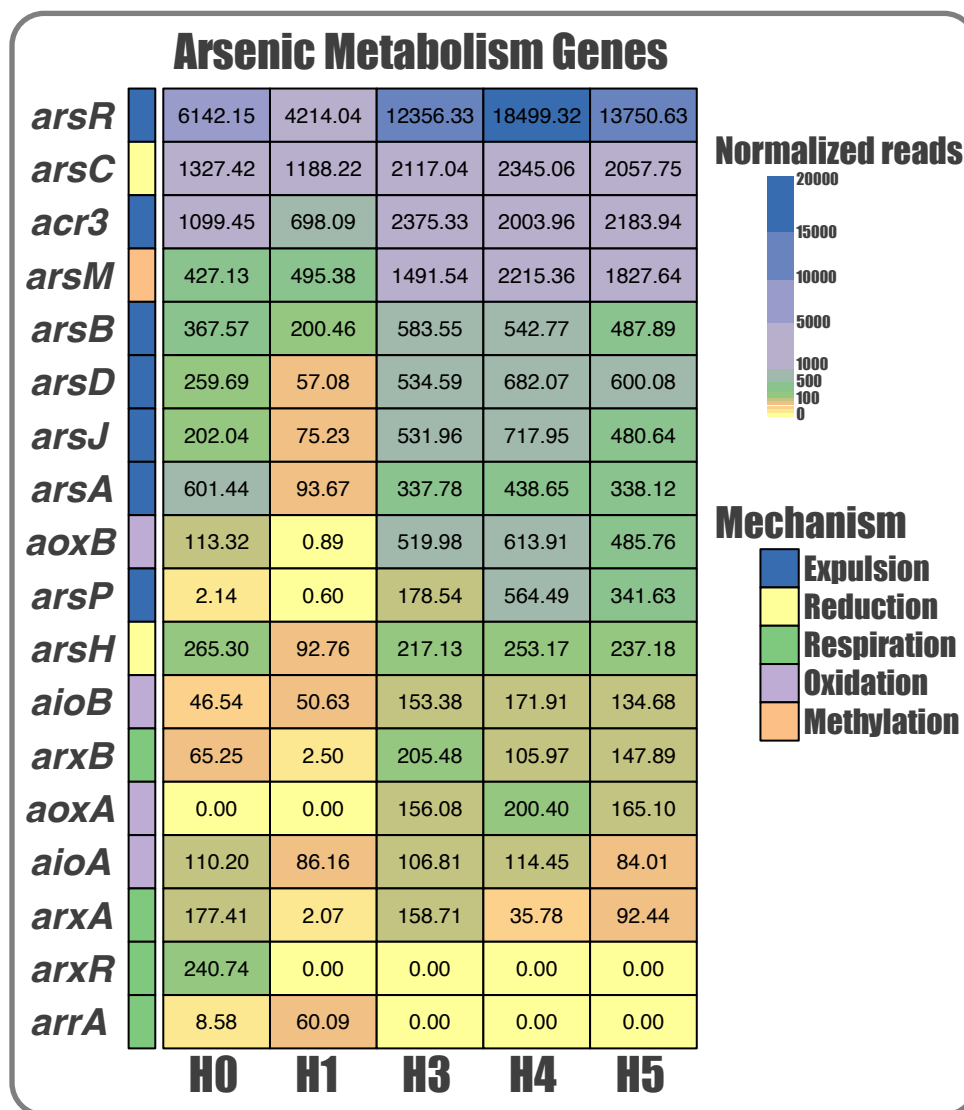

291

292 **Figure 4. Distribution and abundance of As metabolism genes in the Salar de Huasco.**

293 Heatmap shows the (normalized) number of reads that aligned against the corresponding

294 protein identified in each sample, according to the color scale. Genes are grouped by colors,

295 representing the 5 As response mechanisms.

296

297 Overall, the proportional distribution pattern of the mechanisms in the 5

298 metagenomes had some similarity and is quite constant (Figure 5). Particularly, the

299 expulsion mechanism as a whole was the most abundant one for all the sites covering

300 around 75% of all the sequences (Figure 5A); observing the greatest differences in oxidation

301 and respiration mechanisms, as we stated before. Additionally, respiration genes are more

302 present in H0 and reduction in H1. Interestingly, the pattern between the five metagenomes

303 seems to be independent of the amount of detected sequences and the arsenic  
304 concentration of the site. Furthermore, comparing the abundance of particular arsenic  
305 efflux pumps (from the expulsion mechanism) we can observe that, indeed, most of the  
306 sequences correspond to *acr3* (Figure 5B); followed by *arsB* and *arsJ*. Notably, *arsP* which is  
307 an efflux permease that confers resistance to organic arsenics (roxarsone and  
308 methylarsenite) was more abundant in the sites with higher arsenic concentration.  
309 Moreover, the higher *acr3* variants and abundance could be due this pump is present in a  
310 wider number of bacteria phyla, covering most of the found diversity (Figure 5C). Also, this  
311 efflux pump seems to be more ancestral, regarding *arsP* and *arsJ* which are only present in  
312 *Proteobacteria* and in more recent branches.

313

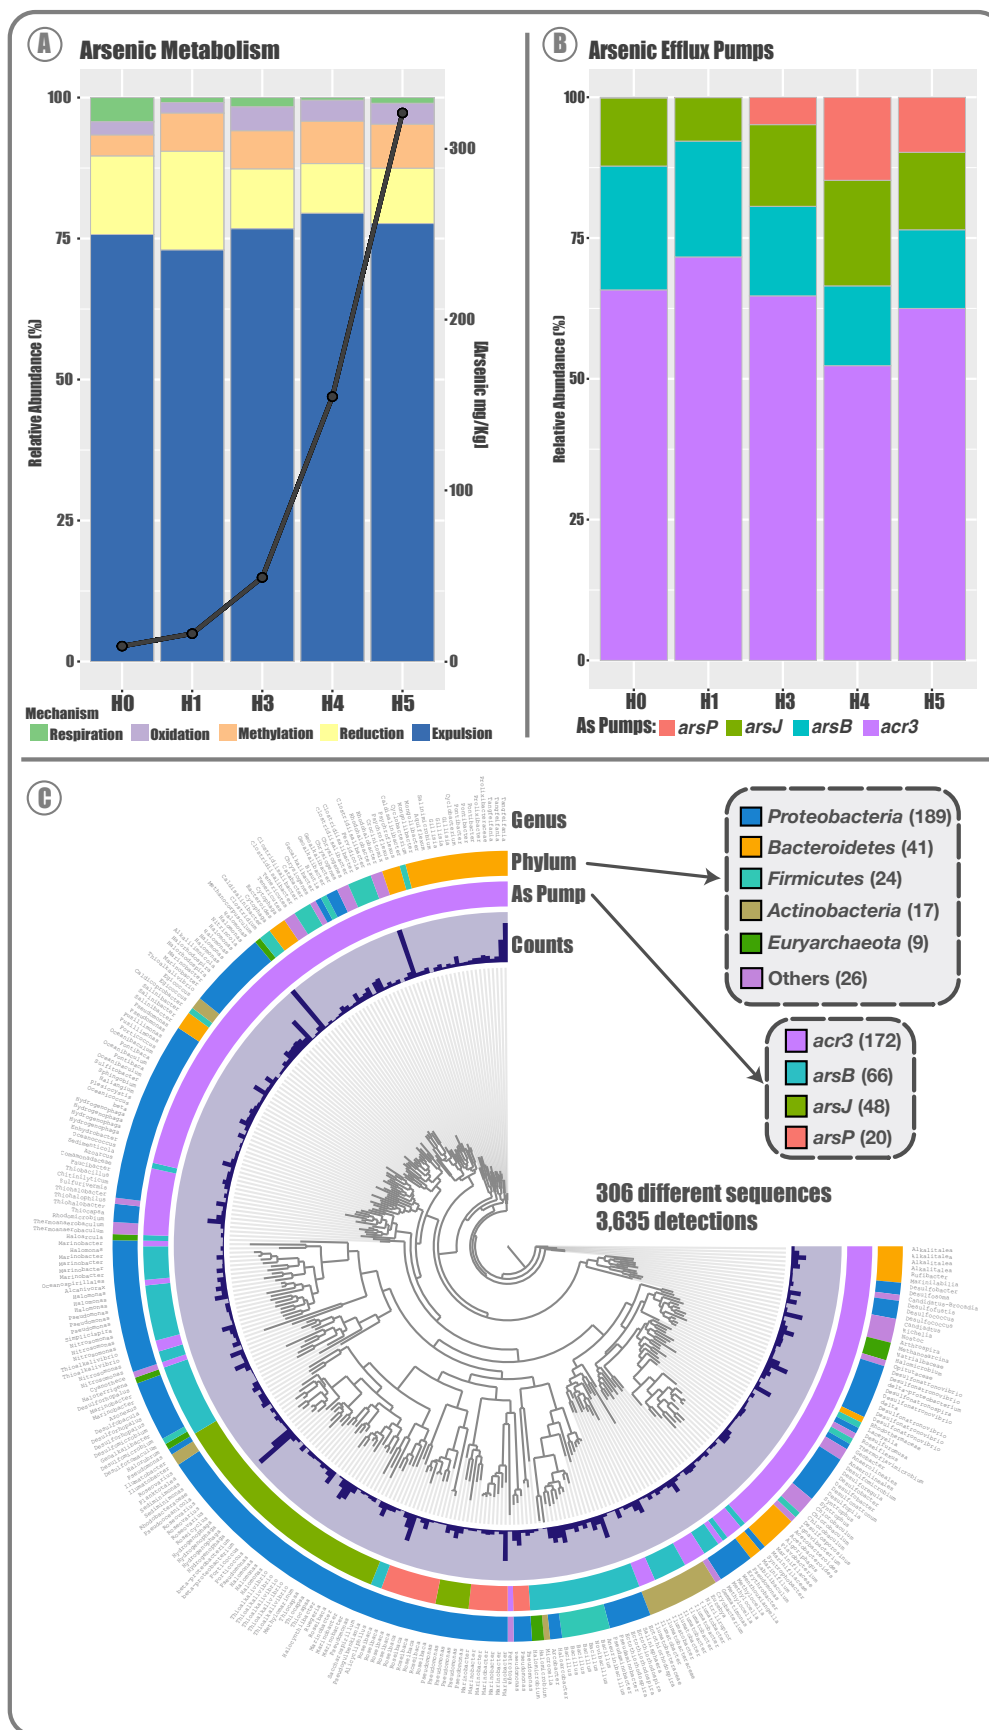

315 **Figure 5. Arsenic metabolism in the Salar de Huasco. A)** Distribution and abundance of  
316 detected genes related to arsenic (As) metabolism in the five SH metagenomes; Stacked  
317 bars represent the proportion of all the genes grouped by mechanism type based on relative  
318 abundance (%), and the line represents total As concentration in each corresponding site  
319 (mg/Kg of sediment). **B)** Stacked bars represent the proportion of all detected As efflux  
320 pumps in the five metagenomes, based on genes relative abundance (%). **C)** Phylogenetic  
321 analysis of 306 non-redundant sequences of arsenic efflux pumps detected in the SH, layers  
322 surrounding the phylogenomic tree indicate: detection level, type of efflux pump,  
323 taxonomy, the phylum level, and the species.  
324

### 325 **Novel genomes from SH belong undescribed genera**

326 The binning the process reconstructed 195 bins (which were manually curated and  
327 evaluated for completion and redundancy) to gain insights of non-culturable bacteria. This  
328 resulted in 19 metagenome-assembled genomes (MAGs) that met the completion  $\geq 80\%$   
329 and redundancy  $\leq 10\%$  criteria (Figure 6); that clustered 4.99% of the contigs in the  
330 metagenome profile database. The MAGs taxonomic affiliation resulted in 1/19 belonging  
331 to the Eukaryota domain and the 18/19 remaining to the Bacteria domain, distributed in 4  
332 different phyla (9 *Proteobacteria*, 7 *Bacteroidota*, 1 *Cyanobacteria* and 1  
333 *Gemmatimonadetes* (Figure 6A). We only were able to assign 22% (4/18) of the Bacteria  
334 MAGs to previously described genera, suggesting a great diversity of novel species that are  
335 yet to be described. Also, MAGs contigs number was very variable from 208 to 626 among  
336 the Bacteria (Eukaryota being substantially larger: 4,174), the same tendency was observed  
337 for the GC-content (36.1% - 69.4%). On the other hand, most of the reconstructed MAGS  
338 were represented or detected in the H3, H4 and H5 metagenomes, showing differential  
339 abundance patterns in each one (Figure 6B; Supplementary Table S4).

340

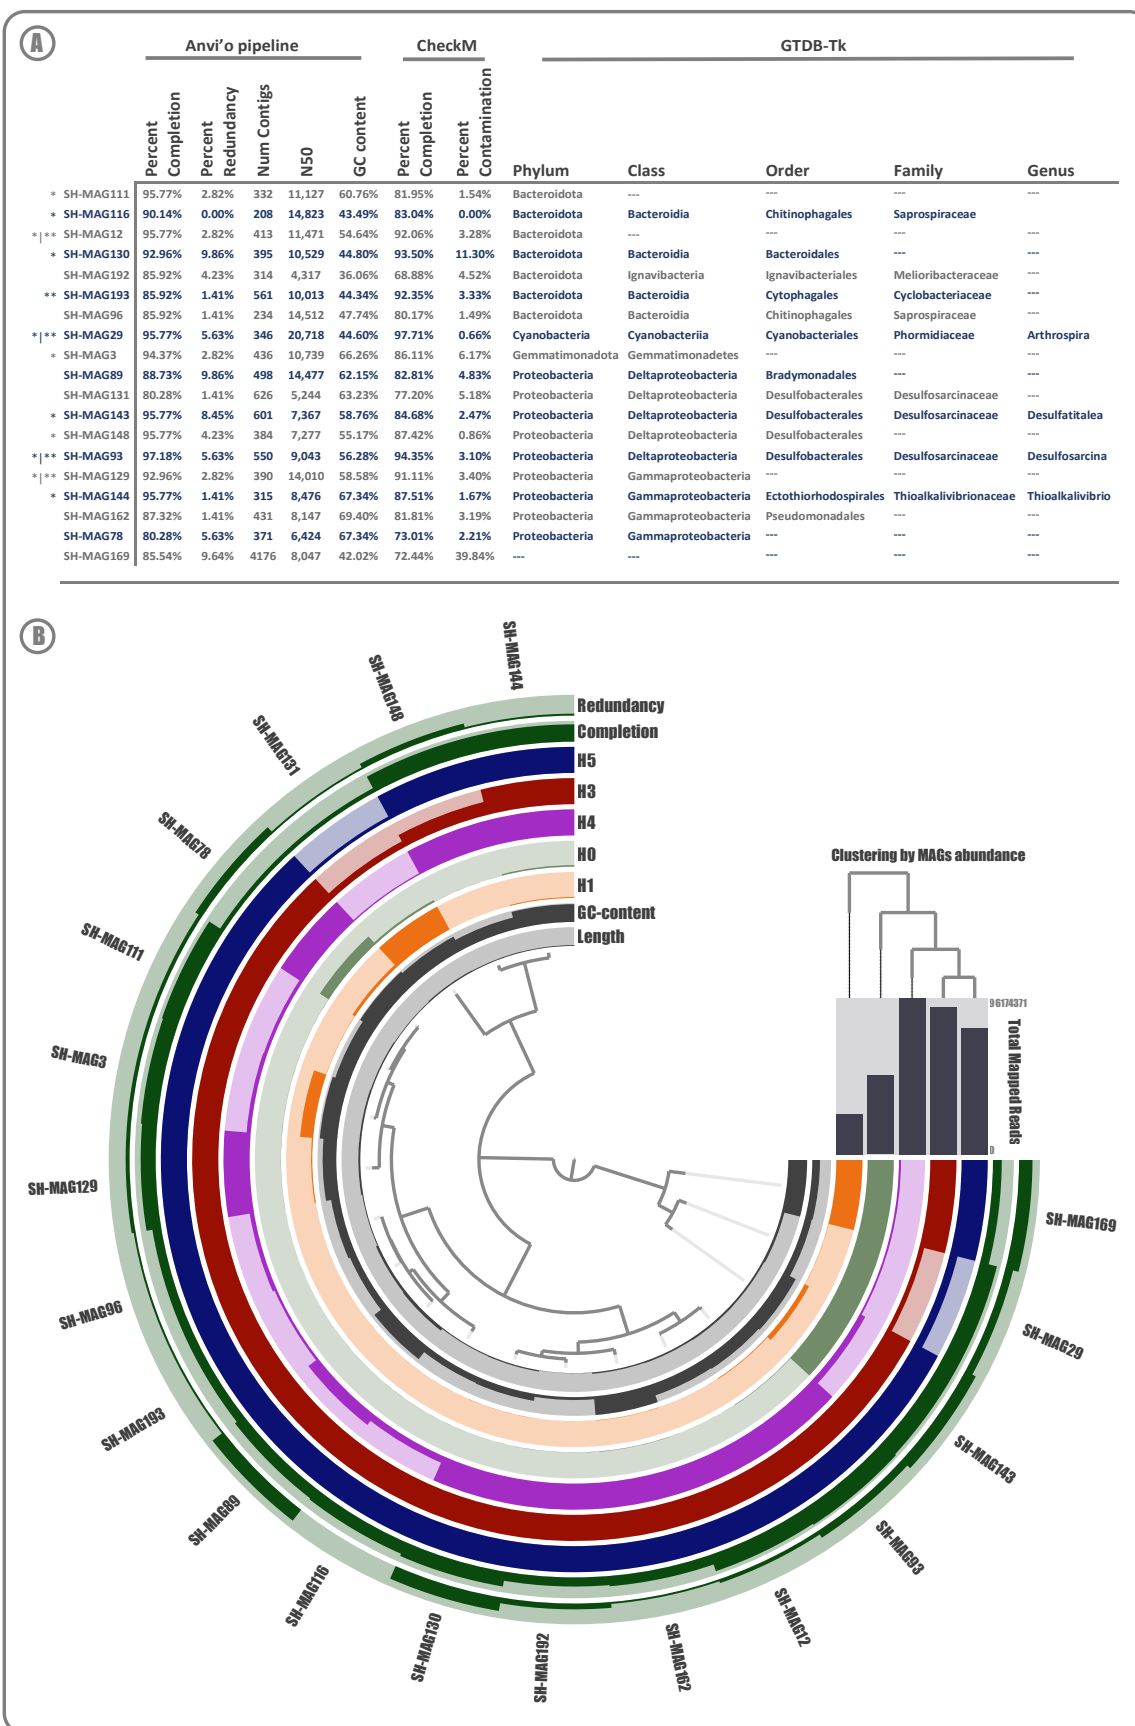



342 **Figure 6. Salar de Huasco Metagenome-Assembled Genomes. A)** Genomic features  
343 summary of the SH 19 MAGs, quality indices, and taxonomic affiliation (the results of  
344 \*Anvi'o pipeline and/or \*\*CheckM meet the quality standard of completion  $\geq 90\%$  and  
345 redundancy/contamination  $\leq 10\%$  (according to 125). **B)** Presence and abundance of the 19  
346 MAGs on the five SH metagenomes: the central tree represents the MAGs organization on  
347 Ward's linkage with Euclidean distances, the seven circle layers (from bottom-up)  
348 represent, for the corresponding MAG: its length, GC-content, and abundance on the five  
349 metagenomes. The top-right bars represent the total number of mapped reads for the  
350 corresponding metagenome and the dendrogram their clustering by absence/presence  
351 profile.

352

### 353 **Novel genomes from SH are mostly arsenic reducers**

354 The functional potential of reconstructed MAGs was evaluated globally and  
355 particularly in relation to their repertoire of arsenic associated genes (Figure 7). For these  
356 evaluations, only the 12 MAGs that meet the quality standard of completion  $\geq 90\%$  and  
357 redundancy/contamination  $\leq 10\%$  were considered. Therefore, a total of 267 KEGG modules  
358 were detected among the MAGs, presenting variable absence/presence and completion  
359 patterns (Figure 7A; Supplementary Table S5). This variation reflects the MAGs taxonomic  
360 affiliations, being all the *Bacteroidota* (MAG111, MAG12, MAG116, MAG130 and MAG193)  
361 clustered together, as well as the *Deltaproteobacteria* (MAG148, MAG143 and MAG93) and  
362 *Gammaproteobacteria* (MAG129 and MAG144). On the other hand, the only *Cyanobacteria*  
363 (MAG29) is close to the *Gammaproteobacteria* and the only *Gemmatimonadota* (MAG3) is  
364 close to the *Bacteroidota*. Particularly, the MAGs presented a considerable number of genes  
365 regarding arsenic metabolism, where the same tendency shown before was observed; with  
366 a dominant presence of genes related to As expulsion (*acr3*, *arsA*, *arsJ* and *arsR*) throughout  
367 all taxa, followed by reduction (*arsC* and *arsH*) and methylation (*arsM*) (Figure 7B,  
368 Supplementary Table S6). Interestingly, *arsJ* was only detected in one *Proteobacteria*, which  
369 agrees with its lower abundance found at the metagenomic level in the SH. While, *arsH* was  
370 only detected in the *Cyanobacteria*, which could also reflect the abundance of this taxa and  
371 this gene globally. In addition, the absence/presence patterns among the MAGs seems to  
372 be group-specific, broadly associated by phyla.

373



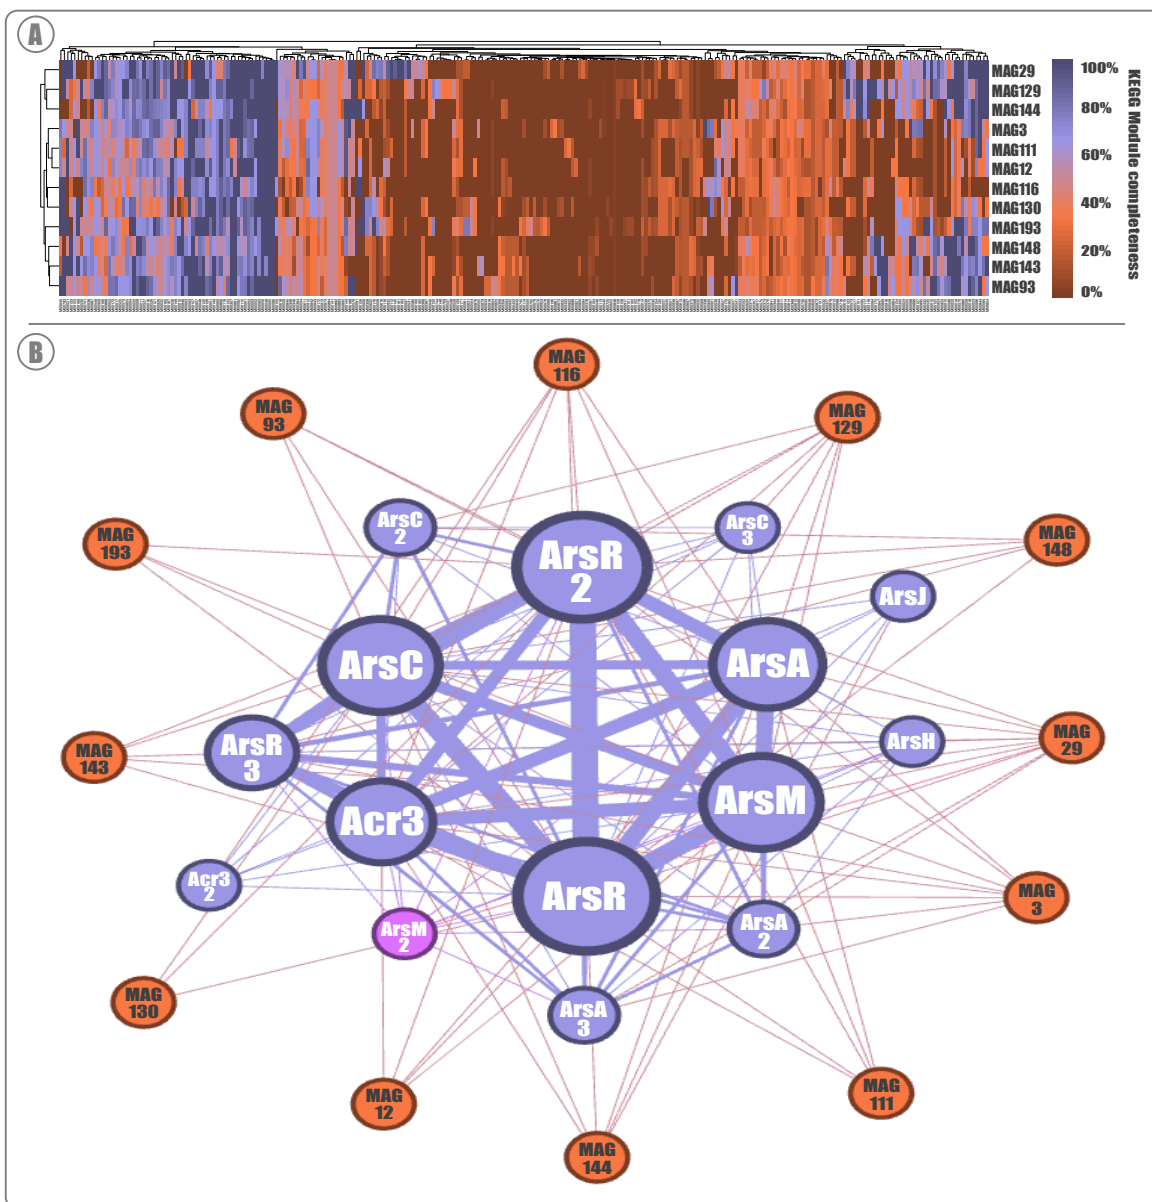

374

375 **Figure 7. MAGs functional potential profiles: global and arsenic specific. A)** Metabolic  
376 capabilities of the 12 selected MAGs according to KOfam (KEGG Orthologs database); the  
377 heatmap shows the KEGG Modules completion displayed by the color gradient for given  
378 module in each corresponding MAG. **B)** Functional network analysis of the 12 MAGs  
379 according to the presence and abundance of detected arsenic metabolism genes; size of  
380 gene nodes represents the level of detection, and the size of the edges represents the  
381 correlation level. Blue nodes represent genes, and orange nodes represent MAGs.

382

383

384 **DISCUSSION**

385           The Salar de Huasco has an important spatial variation of arsenic in sediments, which  
386 we have described as a gradient from north to south (Figure 1) (9); being consistent with  
387 the widely reported heterogeneity for this area and the impact of extreme conditions over  
388 the inhabitant organisms (30). Previous studies have detected variations in conductivity,  
389 organic matter, and dissolved oxygen even in geographically closed areas (6, 7, 31, 32, 33).  
390 In aquatic ecosystems, the quantity of trace elements and physical-chemical states of some  
391 elements, are related to their circulation/interaction, and with the mechanisms of  
392 corresponding living organism (34). Salar flats as SH have the peculiarity of containing more  
393 than 50% of CaCO<sub>3</sub> and high levels of arsenic, which is very available and highly mobile. This  
394 is because a fraction of the arsenic in sediments lies as soluble salts (Na<sub>2</sub>HAsO<sub>4</sub>); it also could  
395 be associated to the calcium carbonate (CaHAsO<sub>4</sub>) and, adsorbed into Fe and Al oxides (35).  
396 The metabolism of inhabiting microbial communities or the activity of primary producers  
397 could be the source of the diversity of abiotic properties (36). It is hypothesized that this  
398 spatial and functional heterogeneity is the cornerstone of resilience in these extreme  
399 ecosystems. We must consider the presence of high concentrations of arsenic as a selective  
400 pressure, which could have a modulating effect on the composition of the H3, H4 and H5  
401 communities (grouping them together and separating them from the rest).

402

403           The five communities described from the SH metagenomes are dominated by  
404 *Proteobacteria*, *Bacteroidetes*, and *Cyanobacteria* (Figure 2), similar to previous reports for  
405 other Altiplanic environments (Socompa volcanic Lake in Argentina and La Brava Lagoon -  
406 Salar de Atacama in Chile) mostly carried out by 16S rRNA amplicon sequencing (37, 38).  
407 Specifically, the same pattern has been reported previously for the SH (3, 32). However, the  
408 proportions are different, probably because the shotgun metagenomic sequencing used in  
409 this study is more sensitive, which is evidenced by the alpha diversity indices' magnitude.  
410 Nevertheless, these values are also higher than those reported by other metagenomic  
411 studies from similar areas (39).

412

413           Moreover, there is evidence of *Proteobacteria* enrichment in places with different  
414 arsenic concentrations (12), as many microorganisms described in this group are capable of  
415 interacting and tolerate arsenic. Some examples are *Acidithiobacillus* and *Desulfovibrio*  
416 genera, which can solubilize arsenic from solid compounds or precipitate it by coupling  
417 arsenic and sulfur reduction, respectively (10, 40). The phylum *Bacteroidetes* is widespread  
418 and commonly found in hyper-saline wetlands and microbial mats (38, 41, 42, 43, 44, 45).  
419 Furthermore, *Cyanobacteria* have fundamental roles in any community they belong to, as  
420 primary producers and participating in bio-weathering and matrix transformation processes  
421 (46). Also, they are usually abundant in places exposed to sunlight (47). Besides, previous  
422 reports have proposed the cyanobacterial communities in SH are unique (6). In addition,  
423 many recurrent representatives of these communities (*Marinobacter* and *Halomonas*) have  
424 been cultured and isolated in laboratory conditions (29). Particularly, we isolated  
425 *Exiguobacterium* strains from these communities to describe the mechanisms responsible  
426 for their high arsenic resistance (9, 48, 49).

427

428           On the other hand, a high percentage of unidentified genera have also been  
429 reported in the Chilean Atacama Desert, where those reach 66% putatively novel taxa  
430 belonging to that bacterial “dark matter” (50), this is a direct consequence of database  
431 shortage, reinforcing the need to keep exploring these unique environments and describe  
432 the novel, highly adapted microorganisms that remain unknown to science and that are of  
433 fundamental importance to the maintenance of these ecosystems. The co-occurrence  
434 networks show clear evidence of overlapping among the bacterial taxonomic composition  
435 of the metagenomes or “core microbiome”, mainly composed of unknown and little-  
436 studied/described taxa. As an interaction example, we have *Seohaecicola* and  
437 *Anoxynatronum*, belonging to an isolated in the network involved in nitrogen cycling as  
438 autotrophic and heterotrophic taxa. From the co-occurrence networks, we can infer that  
439 this is a very fragile and susceptible ecosystem as there are no keystone nodes detected  
440 (51).

441

442 At the lower available taxonomic rank, we found some bacteria that are typical for  
443 extreme environments, such as *Thiobacillus*, a well-known sulfur-oxidizing bacterium, and  
444 *Desulfotignum* an anaerobic group known to be sulphate-reducers, as well as other less  
445 studied groups. The most abundant belong to the *Roseovarius* genus, an aerobic, non-  
446 photoautotroph bacterium; *Rhodohalobacter* is a facultative anaerobic, moderately  
447 halophilic group, and *Truepera* comprises aerobic quimio-organotropic alkaliphile  
448 bacterium. This is evidence of the lifestyle diversity that these microorganisms have,  
449 suggesting a cooperative and specialized community. Likewise, this is in coherence with our  
450 other findings, the enrichment of photosynthetic organisms in sites H0 and H1, as well as  
451 *Proteobacteria* as the most abundant group in all the other sampled sites. Other similarities  
452 are evidenced, as the genus *Methylibium* is only found on the H0 site, where the methane-  
453 related metabolism function was found to be enriched in the MEBS analyses. In addition,  
454 the importance of some of these abundant taxa is highlighted, as they are structural parts  
455 in the co-occurrence network, namely *Desulfomicrobium*, *Thiobacillus*, and  
456 *Brumimicrobium*.

457

458 The functional potential of the five SH communities showed similar patterns in  
459 general, with particular differences in some categories following the same association  
460 pattern described before (Figure 3). Comparing each site, we found significant differences  
461 in the enrichment of some important functional categories related to the maintenance of  
462 critical geochemical cycles, including carbon, nitrogen, and phosphate metabolism, stress  
463 resistance, transport of Zinc, Nickel, Cobalt, Iron, Manganese and osmotic stress. Notably,  
464 the two functions with statistical differences between almost all communities were the  
465 Circadian Clock in *Cyanobacteria* and the Calvin Benson cycle, suggesting differences in the  
466 primary production and CO<sub>2</sub> fixation. The Circadian Rhythm is directly influenced by several  
467 abiotic conditions, such as temperature and atmospheric pressure (52). Moreover, the  
468 Calvin Benson cycle was the only metabolic pathway involved in CO<sub>2</sub> fixation reported in an  
469 endolithic halite metagenome analysis, underlining its importance for microbial  
470 communities living in these extreme conditions (53). This agrees with the MEBS analysis

471 results, where the carbon cycle relevant reactions presented a greater variation between  
472 the metagenomes. Particularly, carbon flux control in these communities seems to be  
473 different especially in regard to methanogenesis processes, as the far greater detection of  
474 specific markers in H0 and H1 could account for a high presence of methanogenic species  
475 in these two communities in comparison to the other metagenomes (54). This could be  
476 related to the S decrease in H1, implying that methanogens outcompete sulfate reducers in  
477 this community (55).

478

479 Furthermore, among these significant differences, arsenic resistance is enriched in  
480 the metagenomes from the sites with the highest As concentration, which was expected  
481 and has been reported previously (56, 57). Particularly, the distribution and abundance of  
482 arsenic-related genes in the five SH communities showed significant differences among the  
483 communities (Figure 4), as the presence of arsenic affects the dynamics of inhabiting  
484 microorganisms (18, 58). Therefore, arsenic would promote the selection and abundance  
485 of tolerant microorganisms (59, 60). Our results agree with this premise since the  
486 abundance of all these genes increases following the gradient of arsenic concentration  
487 among the five sites, indicating a different dynamic in each niche, even though there are  
488 geographically closely located.

489

490 Overall, we found that most of the detected genes related to arsenic belong to  
491 expulsion and reduction mechanisms (*arsR*, *arsC*, and *acr3*), which correlates with what was  
492 reported in the Argentinian Altiplano (22). The transcriptional repressor ArsR was the one  
493 with the highest abundance detected; as this protein participates in the regulation of  
494 different arsenic pumps, namely ArsB, ACR3, and ArsP (61, 62); and is also reported to be in  
495 operon conformations along with ArsC or ArsM (63). Hence, it was expected to be the most  
496 abundant and broadly distributed. Moreover, to better assess the proportion of the arsenic  
497 mechanisms found in SH, we separated the genes related to As expulsion out of the cell  
498 from those related to reduction mechanism (usually reported together). This is due to the  
499 fact that gene clusters including *arsB*, *arsP*, *arsK*, *arsJ*, and *acr3* are commonly

500 found/reported independent of arsenate reductase *arsC* (9, 62, 64, 65). Also, arsenic  
501 methyltransferase (ArsM) was the next most abundant protein, and particularly enriched in  
502 H3, H4, and H5, suggesting this protein is part of a complementary mechanism used to  
503 thrive in sites with high arsenic concentrations (66).

504

505       Even though proteins related to oxidation and respiration of As are less abundant;  
506 their distribution is interesting, which could be due to niche-specific conditions. Despite  
507 these mechanisms are somewhat known and recurrent, much remains unclear, mostly  
508 regarding their function and interconnection with the bacterial central metabolism (67, 68).  
509 This problem is exacerbated when working in unexplored environments, where unknown  
510 or unclassified organisms abound. Besides, the amount of misclassified and/or unclassified  
511 protein sequences in databases is a major blockage for these investigations. Nonetheless,  
512 this is fully acknowledged and is being addressed; thus, helping to generate important  
513 findings (69, 70, 71, 72). For example, our group was able to manually identify the ArsP and  
514 ArsK transporters, as well as a possible arsenic respiration system, additionally a missing  
515 arsenic methylase was evidenced in *Exiguobacterium* genomes using a combination of  
516 bioinformatic tools (9). Nevertheless, database shortage and the classification by homology  
517 problems must always be considered when gene- or metabolism- detection is being carried  
518 out.

519

520       Broadly, the most abundant mechanism found in the SH was arsenic expulsion, with  
521 around 75% of all the arsenic-related sequences (Figure 5). Nonetheless, by merging the  
522 expulsion and reduction mechanisms, we would get results consistent with previous reports  
523 for paddy, contaminated, and natural arsenic-rich soils (around 85%) for the reduction  
524 mechanism (56). Likewise, here we report that mechanism proportions are relatively  
525 equivalent between the five SH sites, and those are independent of the total sequence  
526 abundance as well as the arsenic concentration. Whereas respiration and oxidation  
527 mechanisms showed some variation, which could be reflecting the taxonomic composition  
528 of the communities. Furthermore, we also found that the Organoarsenical Permease *arsP*

529 was detected in the higher arsenic concentration sites. Therefore, this may be a  
530 counteraction against a possible greater production of these highly toxic organic species at  
531 these sites, where consistently the Arsenite Methyltransferase (*arsM*) gene was enriched  
532 as well. Thus, these markers could be proposed as an arsenic contamination bioindicator  
533 like *acr3* (73). Additionally, the distribution and phylogenetic relationships of arsenic pumps  
534 among the metagenomes revealed distinct groups, which is consistent with those  
535 previously reported: I) ArsB - Acr3 [ion/BART], II) ArsP [Permease]; III) ArsK - ArsJ [MFS] (65).  
536 It has been hypothesized that the divergence presented by the arsenic resistance  
537 mechanisms originated from Earth's geological changes to adapt for a particular function or  
538 As emergent species (74). Besides, we found that *Proteobacteria* possess a broader gene  
539 repertoire for arsenic response, which has also been described before (22).

540

541 The twelve reconstructed high-quality MAGs provide information about the  
542 abundance and distribution of undescribed or unknown microorganisms (Figure 6), as well  
543 as genomic insights into widespread arsenic metabolism. Most of these are affiliated within  
544 *Proteobacteria* and *Bacteroidetes* phyla, reflecting what we described at the community  
545 level. As stated before, the recovery of MAGs complements decades of cultivation and PCR-  
546 survey efforts by providing information about taxa missing in culture collections (Candidate  
547 Phyla Radiation), improving our understanding of microbial communities (75); particularly  
548 those inhabiting extreme environments. Nonetheless, four MAGs were classified at the  
549 genus rank: *Arthrospira*, a *Cyanobacteria* with great commercial interest as a pigment  
550 source and to make spirulina supplements; *Thioalkalivibrio*: an aerobic sulfur-oxidizer;  
551 *Desulfatitalea* and *Desulfosarcina*: two anaerobic sulfate reducers (76, 77, 78).

552

553 In the same way that these MAGs only cover the most abundant phyla of SH, we  
554 only detected genes that belong to the most prevalent arsenic resistance mechanisms on  
555 them (Figure 7). Thus, supporting expulsion, reduction, and methylation as the most  
556 recurrent widespread mechanisms in the SH to cope with the high arsenic concentrations.  
557 Conversely, no arsenic oxidation and/or respiration-related gene was detected on the



558 recovered MAGs. This could indicate that the different ways used to expel the toxic out of  
559 the cell would be more straightforward and direct as a first line of defense against arsenic;  
560 while the oxidation and respiration would involve a coupling with the bacteria central  
561 metabolism and a larger machinery to benefit from this compound, which seems to be  
562 associated with less abundant and highly adapted or specialized bacteria. Also, arsenic  
563 oxidation and respiration have been reported in association with nitrate and sulfate  
564 reduction, respectively (10, 79). Nonetheless, we need to take into consideration the MAGs  
565 completion levels as a possible source for missing genes.

566

567 Overall, our results reveal that populations of *Proteobacteria*, *Bacteroidetes* and  
568 *Cyanobacteria* are abundant across wide ecological niches in the SH spanning a challenging  
569 ensemble of environmental conditions and physico-chemical parameters, among which  
570 arsenic is highly relevant. As the arsenic cycle and the bacterial contribution to it, has yet to  
571 be completely understood, more environmental studies are needed, while metagenomic  
572 approaches have been shedding light on the possible role of unknown or undescribed  
573 microorganisms additional transcriptomic, metabolomic and cultivation approaches will be  
574 essential to define these phenomena and its relevance in a global context.

575

576

## 577 **CONCLUSION**

578 The Altiplano array of ecological niches is a reservoir for microbial diversity, showing  
579 great richness in adapted organisms capable of facing these challenging conditions.  
580 Particularly, Salar de Huasco is a highly diverse ecosystem, where salinity and As  
581 concentration contribute to shaping the community composition, mainly represented by  
582 *Proteobacteria* and *Bacteroidetes*. Also, the interaction networks within these communities  
583 showed three distinct groups of related taxa, but no “key stone” nodes were found.  
584 Nonetheless, little niche overlap was determined. Altogether, these indicate that SH studied  
585 niches harbor highly diverse communities, being H1 and H5 the most contrasting ones.  
586 Moreover, the most abundant arsenic-related genes found in these communities indicate



587 that the As(V) reduction and subsequent As(III) expulsion would be the most common  
588 strategy used to detoxify the cell of arsenic; furthermore, regarding to the expulsion pumps,  
589 the most abundant were Acr3, followed by ArsB; however, in sites with high As  
590 concentration ArsP begins to be enriched. In addition, 12 high-quality, non-redundant  
591 MAGs were reconstructed from the metagenomes; those represented the dominant  
592 diversity detected across the communities as well as the metabolic variability and the  
593 presence of marker-genes related to the most recurrent As resistance mechanisms  
594 (expulsion, reduction and methylation). Finally, in order to further elucidate the strategies  
595 and relationships between the microbial taxa and among biotic and abiotic components  
596 within the ecosystem, further multidisciplinary studies are required, as well as the use of  
597 the ever evolving NGS approaches with the increasing database information to better  
598 understand the evolutionary process of adaptation to the extreme conditions presented by  
599 these unique ecosystems.

600

601

## 602 **MATERIALS AND METHODS**

### 603 **Study Area and Sampling**

604 Salar de Huasco National Park (SH) is an area located on the Chilean Altiplano that is  
605 known for its spatial heterogeneity, as well as great biodiversity and physicochemical  
606 characteristics. This ecosystem is mostly composed of streams, salt crusts, peatlands, and  
607 shallow (permanent and non-permanent) lakes with salinity and arsenic gradients from  
608 north to south (9). We sampled surface sediments (to a depth of 5 cm) in sterile tubes from  
609 five different sites (H0 to H5 previously described in (6)) by duplicate during fieldwork done  
610 in June 2018; those samples were kept and transported in a cooler until stored at -20°C for  
611 subsequent DNA extraction. Physicochemical parameters like temperature, salinity, and pH  
612 were recorded (HI 98192 and HI 2211 - HANNA Instruments) *in situ* (Figure 1).

613

### 614 **DNA extraction and high throughput shotgun sequencing**

615 Total DNA was extracted from the sediment samples from each SH site using the  
616 DNeasy PowerSoil Kit (Qiagen Inc., Hilden, Germany) following manufacturer's instructions.  
617 DNA integrity, quality, and quantity were verified through 1% agarose gel electrophoresis,  
618 OD<sub>260/280</sub> ratio, and fluorescence using a Qubit® 3.0 Fluorometer along with the Qubit dsDNA  
619 HS Assay Kit (Thermo Fisher Scientific, MA, USA). Next, Paired-end (150bp) libraries were  
620 constructed for each sample in duplicates, at the Centro de Biotecnología Vegetal,  
621 Universidad Andrés Bello (Santiago, Chile) using the TruSeq Nano DNA Kit (Illumina Inc., CA,  
622 USA.) following the TruSeq Nano DNA Sample Preparation Guide 15041110 Rev. D. Libraries  
623 were sent for sequencing at Macrogen Inc. (Seoul, Korea) on a HiSeq 4000 platform  
624 (Illumina Inc., CA, USA). Then, raw data was evaluated using FastQC v0.11.8 (80) for quality  
625 control, adapters were removed from the reads of all samples using Trimmomatic v0.30  
626 (81) and the filtering and trimming (length ≤ 100bp, Ns = 0, and Q ≤ 30 thresholds) was  
627 performed with PRINSEQ v0.20.4 (82). The whole raw data sets have been deposited at  
628 DDBJ/ENA/GenBank under the Bioproject: PRJNA573913.

629

### 630 **Taxonomic profiling analysis**

631 Quality-controlled reads for each sample were profiled using the phyloFlash pipeline  
632 (83) to obtain all reads that align with the bacterial SSU rRNA (small-subunit rRNA) SILVA  
633 v138 database (84). Later, these sequences (FASTQ files) were processed using R v3.5.2 and  
634 RStudio v1.1.463 (85, 86) following the DADA2 v1.16.0 R package pipeline (87) to infer  
635 amplicon sequence variants (ASVs) present in each sample. Briefly, after dereplication,  
636 denoising, and paired reads merge steps, the ASV table was built with 97% clustering, the  
637 chimeras removed, and the taxonomic was assigned against the Silva v138 database (84)  
638 using DADA2 Ribosomal Database Project's (RDP) naive Bayesian classifier (88). Then, data  
639 was normalized by variance stabilizing transformation using the R package DESeq2 v1.28.1  
640 (89). Also, a multiple sequence alignment was created using the R package DECIPHER  
641 v2.16.1 (90) to infer a phylogeny with FastTree v2.1.10 (91). Furthermore, a phyloseq-object  
642 (containing the ASVs, taxonomy assignation, phylogenetic tree, and samples meta-data)  
643 was created using the R package Phyloseq v1.32.0 (92); in order to calculate the alpha

644 diversity indexes, along with btools v0.0.1 R package. Also, beta diversity (PCoA - Bray Curtis  
645 distance with environmental variables fit) was calculated using the R package ampvis2  
646 v2.4.5 (93), and visualizations were generated with ggplot2 v2.2.1 (94) R package.

647

#### 648 **Co-occurrence networks**

649 We used the same phyloseq object, which was agglomerated by best hit using the  
650 microbiomeutilities v1.00.11 R package (95); filtered by tax abundance (0.5% in at least one  
651 sample) using the Genefilter v 1.72.0 (96) and Phyloseq v1.32.0 (92) R packages. Then, the  
652 co-occurrence network was estimated using the SPIEC-EASI v0.1.4 R package (SParse  
653 Inverse Covariance Estimation for Ecological Association Inference) (97), using  
654 neighborhood selection model ( $\lambda_{\min} = 1e-2$ ,  $n_{\lambda} = 20$ , and 50 replicates  
655 parameters). Finally, the network was visualized using the ggnet2 function of GGally v1.5.0  
656 R package (a ggplot2 extension) (98).

657

#### 658 **Functional profiling analysis**

659 The patterns of functional potential as subsystems with different specificity levels  
660 for each community were determined by the presence/absence and relative abundance of  
661 the quality-controlled reads that aligned against the metabolic pathways and functions in  
662 the SEED database (99) with SUPER-FOCUS v0.35 software (100), which uses DIAMOND  
663 v2.0.6 (101) for fast and efficient alignment. Statistical analysis was carried out in STAMP  
664 v2.3.1 (Software package for Analyzing Taxonomic or Metabolic Profiles) (102) using  
665 Welch's t-test to compare all samples.

666

#### 667 **Metagenome co-assembly and read mapping**

668 As we need for subsequent analyses: i) a co-assembly (the reads from all samples  
669 assembled together: .fasta file), ii) its annotations (.gff, .ffn and .faa files) and iii) an  
670 alignment per samples (all the reads from each sample mapped against the co-assembly:  
671 .bam files); we proceeded to assemble the quality-controlled reads from all samples using  
672 MEGAHIT v1.1.3 (103), with the `-presets meta-large` option and a minimum contig length

673 of 1 kb. The co-assembly was then evaluated with MetaQUAST v5.0.2 (104) and annotated  
674 with Prokka v1.11 (105) using the metagenome mode. Furthermore, we mapped the  
675 quality-controlled reads from each sample against the co-assembly using Bowtie2 v2.3.4  
676 (106) and stored the recruited reads (sorted and indexed) as BAM files using SAMtools v1.3  
677 (107).

678

### 679 **Metagenome profiling**

680 We followed the *anvi'o* v7 pipeline (108). First, we created a contig database with  
681 the co-assembled contigs, which uses Prodigal v2.6.3 (109), HMMER v3.3.1 (110) and NCBI  
682 COGs (111) to identify genes calls and functionally annotate them (*anvi-gen-contigs-*  
683 *database*, *anvi-run-hmms*, *anvi-run-ncbi-cogs*). Secondly, we profiled each sample's BAM  
684 file against the contigs database to estimate the detection and coverage statistics for each  
685 contig (*anvi-profile*). Then, we combined the profiles in a single merged metagenomic  
686 profile database, which uses all individual statistics to compute hierarchical clustering of  
687 the contigs (*anvi-merge*). Finally, we visualized the merged profile on the *anvi'o* interactive  
688 interface, which allows easy exploration and curation of the metagenomes (*anvi-*  
689 *interactive*). On the other hand, we used MEBS (Multigenomic Entropy Based Score) v1.0  
690 package (112) to evaluate and compare the S, N, O, CH<sub>4</sub>, and Fe biogeochemical cycles on  
691 each metagenome using the predicted proteins (annotated .faa file from each individual  
692 assembly).

693

### 694 **Metagenome target gene search**

695 To estimate the abundance of genes related to arsenic metabolism, the read counts  
696 for each predicted gene of each sample were obtained using the corresponding BAM file  
697 and the co-assembly annotated GFF file, with HTSeq-Counts v0.13.5 (113). Also, we  
698 constructed a database from the GenBank – “Identical Protein Groups” with all available  
699 prokaryotic proteins of arsenic metabolism (Acr3, AioA, AioB, AioR, AioS, AioX, AoxA, AoxB,  
700 AoxC, AoxD, ArrA, ArrB, ArrC, ArsA, ArsB, ArsC, ArsD, ArsH, ArsJ, ArsK, ArsM, ArsN, ArsO,  
701 ArsP, ArsR, ArsT, ArxA, ArxB, ArxR, ArxS and ArxX) and this was targeted with the co-

702 assembly predicted proteins (.faa file) using CRB-BLAST v0.6.6 (E-value  $\geq 1E^{-05}$ , Identity  $\geq 70\%$   
703 and Query Coverage  $\geq 70\%$ ) (114). Finally, matching the hits with the gene counts  
704 (normalized by the target gene length and the corresponding library size), we calculated the  
705 relative abundance of the interest genes for the five metagenomes. Visualizations were  
706 made with R packages ggplot2 v2.2.1 (94) and pheatmap v1.0.12 (115). Furthermore, all the  
707 detected sequences that corresponded to arsenic efflux pumps were extracted from the  
708 .ffn file and aligned using MAFFT v7 (116). As phylogeny inference was calculated with  
709 FastTree v2.1.10 (91) and visualized with the anvio v7 interactive interface (108).

710

### 711 **Metagenomic binning**

712 The contigs in the metagenome profile were clustered through anvio v7 (108) using  
713 CONCOCT v1.1.0 (117) binning program, which adds a bins collection to the profile (anvi-  
714 cluster-contigs). The resulting bins were evaluated for completion/redundancy, and manual  
715 curation/refinement was carried out in the interactive interface (anvi-estimate-genome-  
716 completeness and anvio-refine). Finally, the refined bins were displayed in the interactive  
717 interface and summarized to obtain all the statistics and files for downstream analysis (anvi-  
718 interactive and anvio-summarize).

719

### 720 **MAGs evaluation, taxonomy, and functional estimation**

721 We define MAGs (Metagenome Assembled Genomes) as bins with a completion  
722  $>80\%$  and redundancy  $<10\%$ . Then, we used CheckM v1.0.13 (118) for a more robust  
723 evaluation. Later, to infer MAGs taxonomy, we used GTDB-Tk v0.3.2 (119) along with The  
724 Genome Taxonomy Database (120). Moreover, we estimated the MAGs metabolic potential  
725 by evaluating their gene content with anvio v7 (108); First, functions and metabolic  
726 pathways were annotated to the MAGs using HMM hits from Kofam - KEGG Orthologs (KO)  
727 database (121, 122) (anvi-run-kegg-kofams). Secondly, relying on these KO annotations, the  
728 metabolic pathways were predicted considering those defined by KOs in the KEGG  
729 MODULES resource (123), where a KO represents a gene function, and a module represents  
730 a group of KOs that together carry out the reactions in a metabolic path (anvi-estimate-

731 metabolism). The MAGs module completion was visualized using pheatmap v1.0.12 R  
732 package (115).

733

#### 734 **MAGs target gene search**

735 All MAGs were queried against the same previously constructed database (with the  
736 arsenic metabolism genes) using CRB-BLAST v0.6.6 (E-value  $\geq 1E^{-05}$ , Identity  $\geq 70\%$  and Query  
737 Coverage  $\geq 70\%$ ) (114). Furthermore, the resulting hits matrix was compared and  
738 supplemented with the detected KOfams related to arsenic, and the final matrix was used  
739 to generate a functional network using Gephi v0.9.2 (124) to connect MAGs and detected  
740 genes.

741

742

#### 743 **DATA AVAILABILITY**

744 The whole raw data sets have been deposited at DDBJ/ENA/GenBank under the Bioproject:  
745 PRJNA573913.

746

747

#### 748 **AUTHOR CONTRIBUTIONS**

749 JC-S, CP-E, EC-N, FR, and CPS conceived and designed the study. JC-S, JF, FM, FR, and CPS  
750 performed the field work. JC-S and CP-E processed the samples, performed the  
751 experimental procedures and carried out the bioinformatics analyzes. KM, SM and EC-N  
752 contributed with critical bioinformatics advice. CPS, FR, and EC-N contributed with reagents,  
753 materials, and analysis tools. JC-S and CP-E interpreted the results and wrote the first  
754 manuscript draft. All authors read and approved the final manuscript.

755

756

#### 757 **ACKNOWLEDGEMENTS**

758 We would like to thank the illustrator Florence Gutzwiller for the SH landscape painting  
759 (<https://spideryscrawl-illustration.webnode.com/>). Also, we would like to thank

760 Universidad Andres Bello's high-performance computing cluster, Dylan  
761 (<http://www.castrolab.org/>), for providing data storage, support, and computing power for  
762 bioinformatic analyses. Also, We would also like to thank the MerenLab group  
763 (<https://merenlab.org/>) for their reachability in providing help, advice and solutions related  
764 to the use of Anvi'o. In addition, we'd like to thank to Dra. Valerie de Anda  
765 (<https://valdeanda.github.io/>) for the guidance and advice to implement the MEBS  
766 software.

767

768

#### 769 **FUNDING**

770 This research was sponsored by ANID (Agencia Nacional de Investigación y Desarrollo de  
771 Chile) grants. CPS was funded by ANID-FONDECYT regular 1210633 and ECOS-ANID 170023.  
772 EC-N was funded by ANID-FONDECYT Regular 1200834 and ANID-PIA-Anillo INACH  
773 ACT192057. JC-S was founded by ANID 2021 Post-Doctoral FONDECYT 3210156. CP-E was  
774 founded by Universidad Católica del Norte 2021 Post-Doctoral fellowship. The funders had  
775 no role in study design, data collection and analysis, decision to publish, or preparation of  
776 the manuscript.

777

778

#### 779 **CONFLICT OF INTEREST STATEMENT**

780 The authors declare that the research was conducted in the absence of any commercial or  
781 financial relationships that could be construed as a potential conflict of interest.

782

783

#### 784 **REFERENCES**

- 785 1. Bahram M, Netherway T, Frioux C, Ferretti P, Coelho LP, Geisen S, Bork P, Hildebrand  
786 F. 2020. Metagenomic assessment of the global diversity and distribution of bacteria  
787 and fungi. *Env Microbiol* 23(1):316-326
- 788 2. Albarracín V, Kurth D, Ordoñez O, Belfiore C, Luccini E, Salum G, Piacentini R, Farías,  
789 ME. 2015. High-Up: A remote reservoir of Microbial Extremophiles in Central  
790 Andean Wetlands. *Front Microbiol* 6, 1404.



- 791 3. Dorador C, Vila I, Witzel KP, Imhoff JF. 2013. Bacterial and archaeal diversity in high  
792 altitude wetlands of the Chilean Altiplano. *Fundam Appl Limnol* 182, 135–159.
- 793 4. Aceituno P. 1997. Aspectos generales del clima en el Altiplano Sudamericano. In R  
794 Charrier, P Aceituno, M Castro, A Llanos, LA Raggi (Eds.), *El Altiplano: ciencia y*  
795 *conciencia de los Andes, Actas del 21 simposio internacional de estudios altiplánicos*  
796 (pp. 63–69). Santiago, Chile: Universidad de Chile.
- 797 5. Risacher F, Alonso H, Salazar C. 2003. The origin of brines and salts in Chilean salars:  
798 A hydrochemical review. *Earth Sci Rev* 63, 249–293.
- 799 6. Dorador C, Vila I, Imhoff JF, Witzel KP. 2008. Cyanobacterial diversity in Salar de  
800 Huasco, a high altitude saline wetland in northern Chile: an example of geographical  
801 dispersion?. *FEMS microbiol* 64(3), 419-432.
- 802 7. Hernández KL, Yannicelli B, Olsen LM, Dorador C, Menschel EJ, Molina, V,  
803 Remonsellez F, Hengst M, Jeffrey WH. 2016. Microbial activity response to solar  
804 radiation across contrasting environmental conditions in Salar de Huasco, Northern  
805 Chilean Altiplano. *Front Microbiol* 7, 1857.
- 806 8. Molina V, Hernández K, Dorador C, Eissler Y, Hengst M, Pérez V, Harrod C. 2016.  
807 Bacterial active community cycling in response to solar radiation and their influence  
808 on nutrient changes in a high- altitude wetland. *Front Microbiol* 7, 1–15.
- 809 9. Castro-Severyn J, Pardo-Esté C, Mendez KN, Morales N, Marquez SL, Molina F,  
810 Remonsellez F, Castro-Nallar E, Saavedra CP. 2020. Genomic Variation and Arsenic  
811 Tolerance Emerged as Niche Specific Adaptations by Different *Exiguobacterium*  
812 Strains Isolated From the Extreme Salar de Huasco Environment in Chilean–  
813 Altiplano. *Front Microbiol* 11, 1632.
- 814 10. Demergasso CS, Guillermo CD, Lorena EG, Mur JJP, Pedrós-Alió C. 2007. Microbial  
815 precipitation of arsenic sulfides in Andean salt flats. *Geomicrobiol J* 24, 111–123.
- 816 11. Escalante G, Campos V, Valenzuela C, Yañez J, Zaror C, Mondaca M. 2009. Arsenic  
817 resistant bacteria isolated from arsenic contaminated river in the Atacama Desert  
818 (Chile). *Bull Environ Contam Toxicol* 83(5):657H661.
- 819 12. Escudero LV, Casamayor EO, Chong G, Pedrós-Alió C, Demergasso C. 2013.  
820 Distribution of microbial arsenic reduction, oxidation and extrusion genes along a  
821 wide range of environmental arsenic concentrations. *PLoS One* 8(10), e78890.
- 822 13. Finstad KM, Probst AJ, Thomas BC, Andersen GL, Demergasso C, Echeverría A,  
823 Amundson R, Banfield JF. 2017. Microbial community structure and the persistence  
824 of cyanobacterial populations in salt crusts of the hyperarid Atacama Desert from  
825 genome-resolved metagenomics. *Front Microbiol* 8, 1435.
- 826 14. Wang L, Zhipeng Y, Jing C. 2020. Metagenomic insights into microbial arsenic  
827 metabolism in shallow groundwater of Datong basin, China. *Chemosphere*. 245.  
828 125603.
- 829 15. Berhe A, Barnes R, Six J, Marin-Spiotta E. 2018. Role of soil erosion in biogeochemical  
830 cycling of essential elements: carbon, nitrogen, and phosphorus. *Annu Rev Earth Pl*  
831 *Sci* 46, 521–548.
- 832 16. Zhang J, Shi Q, Fan S, Zhang Y, Zhang M, Zhang J. 2020. Distinction between Cr and  
833 other heavy-metal-resistant bacteria involved in C/N cycling in contaminated soils  
834 of copper producing sites. *J Hazard Mater* 402, 123454.



- 835 17. Li Y, Zhang M, Xu R, Lin H, Sun X, Xu F, Gao P, Kong T, Xiao E, Yang N, Sun W. 2021.  
836 Arsenic and antimony co-contamination influences on soil microbial community  
837 composition and functions: Relevance to arsenic resistance and carbon, nitrogen,  
838 and sulfur cycling. *Env Int* 153, 106522.
- 839 18. Andres J, Bertin PN. 2016. The microbial genomics of arsenic. *FEMS Microbiol Rev.*  
840 40:299–322.
- 841 19. Desoeuvre A, Casiot C, Héry M. 2016. Diversity and distribution of arsenic-related  
842 genes along a pollution gradient in a river affected by acid mine drainage. *Microb*  
843 *Ecol* 71(3), 672-685.
- 844 20. Rosen BP. 2002. Biochemistry of arsenic detoxification. *FEBS Lett* 529:86–92.
- 845 21. Sheik CS, Mitchell TW, Rizvi FZ, Rehman Y, Faisal M, Hasnain S, McInerney M,  
846 Krumholz, LR. 2012. Exposure of soil microbial communities to chromium and  
847 arsenic alters their diversity and structure. *PLoS one* 7(6), e40059.
- 848 22. Kurth D, Amadio A, Ordoñez O, Albarracín V, Gärtner W, Farías ME. 2017. Arsenic  
849 metabolism in high altitude modern stromatolites revealed by metagenomic  
850 analysis. *Sci Reports.* 7: 1024.
- 851 23. Danczak RE, Johnston MD, Kenah C, Slattery M, Wilkins MJ. 2019. Capability for  
852 arsenic mobilization in groundwater is distributed across broad phylogenetic  
853 lineages. *PLoS one* 14(9), e0221694.
- 854 24. Dunivin TK, Yeh SY, Shade A. 2019. A global survey of arsenic-related genes in soil  
855 microbiomes. *BMC biology* 17(1), 1-17.
- 856 25. Aykanat T, Lindqvist M, Pritchard VL, Primmer CR. 2016. From population genomics  
857 to conservation and management: A workflow for targeted analysis of markers  
858 identified using genome-wide approaches in Atlantic salmon *Salmo salar*. *J Fish*  
859 *Biol* 89(6), 2658-2679.
- 860 26. Ezeokoli OT, Bezuidenhout CC, Maboeta MS, Khasa DP, Adeleke RA. 2020. Structural  
861 and functional differentiation of bacterial communities in post-coal mining  
862 reclamation soils of South Africa: bioindicators of soil ecosystem restoration. *Sci*  
863 *Rep* 10(1), 1-14.
- 864 27. Dorador C, Vila I, Remonsellez F, Imhoff JF, Witzel KP. 2010. Unique clusters of  
865 Archaea in Salar de Huasco, an athalassohaline evaporitic basin of the Chilean  
866 Altiplano. *FEMS Microbiol* 73(2), 291-302.
- 867 28. Eissler Y, Dorador C, Kieft B, Molina V, Hengst M. 2020. Virus and Potential Host  
868 Microbes from Viral-Enriched Metagenomic Characterization in the High-Altitude  
869 Wetland, Salar de Huasco, Chile. *Microorganisms* 8(7), 1077.
- 870 29. Remonsellez F, Castro-Severyn J, Pardo-Esté C, Aguilar P, Fortt J, Salinas C, Barahona  
871 S, León J, Fuentes B, Areche C, Hernández K, Saavedra CP. 2018. Characterization  
872 and salt response in recurrent halotolerant *Exiguobacterium* sp. SH31 isolated from  
873 sediments of Salar de Huasco, Chilean Altiplano. *Front Microbiol* 9, 2228.
- 874 30. Vásquez-Dean J, Maza F, Morel I, Pulgar R, González M. 2020. Microbial  
875 communities from arid environments on a global scale. A systematic review. *Biol Res*  
876 53(1), 1-12.
- 877 31. Cabrol NA, Grin EA, Chong G, Minkley E, Hock AN, Yu Y, Bebout L, Fleming E, Häder  
878 D, Demergasso C, Gibson J, Escudero L, Dorador C, Lim D, Woosley C, Morris R,

- 879 Tambley T, Gaete V, Galvez M, Smith E, Uskin-Peate I, Salazar C, Dawidowicz G,  
880 Majerowicz J. 2009. The high-lakes project. *J Geophys Res* 114(G2).
- 881 32. Aguilar P, Acosta E, Dorador C, Sommaruga R. 2016. Large differences in bacterial  
882 community composition among three nearby extreme waterbodies of the high  
883 Andean plateau. *Front Microbiol* 7, 976.
- 884 33. Cortés-Albayay C, Silber J, Imhoff JF, Asenjo JA, Andrews B, Nouioui I, Dorador C.  
885 2019. The polyextreme ecosystem, Salar de Huasco at the Chilean Altiplano of the  
886 Atacama Desert houses diverse *Streptomyces* spp. with promising pharmaceutical  
887 potentials. *Diversity* 11(5), 69.
- 888 34. Bourg ACM. 1989. Adsorption of Trace Inorganic and Organic Contaminants by Solid  
889 Particulate Matter, in *Aquatic Ecotoxicology: Fundamental Concepts and*  
890 *Methodologies*. Boudou A and Ribeyre F. eds. CRC Press, Inc. Boca Raton, Florida;  
891 pp.107-148.
- 892 35. Herrera V, De Gregori I, Pinochet H. 2009. Assessment of trace elements and  
893 mobility of arsenic and manganese in lagoon sediments of the salars of Huasco and  
894 Coposa, Chilean Altiplano. *J Chil Chem Soc* 54(3), 282-288.
- 895 36. Oren A. 2013. Life at high salt concentrations, intracellular KCl concentrations, and  
896 acidic proteomes. *Front Microbiol* 4, 315.
- 897 37. Farías ME, Rascovan N, Toneatti DM, Albarracín VH, Flores MR, Poiré DG, Collavino  
898 M, Aguilar M, Vazquez M, Polerecky L. 2013. The discovery of stromatolites  
899 developing at 3570 m above sea level in a high-altitude volcanic lake Socompa,  
900 Argentinean Andes. *PLoS one* 8(1), e53497.
- 901 38. Farías ME, Contreras M, Rasuk MC, Kurth D, Flores MR, Poire DG, Novoa F, Visscher  
902 PT. 2014. Characterization of bacterial diversity associated with microbial mats,  
903 gypsum evaporites and carbonate microbialites in thalassic wetlands: Tebenquiche  
904 and La Brava, Salar de Atacama, Chile. *Extremophiles* 18(2), 311-329.
- 905 39. Saona LA, Soria M, Durán-Toro V, Wörmer L, Milucka J, Castro-Nallar E, Meneses C,  
906 Contreras M, Farías ME. 2021. Phosphate-Arsenic Interactions in Halophilic  
907 Microorganisms of the Microbial Mat from Laguna Tebenquiche: from the  
908 Microenvironment to the Genomes. *Microb Ecol* 1-13.
- 909 40. Ko MS, Park HS, Kim KW, Lee JU. 2013. The role of *Acidithiobacillus ferrooxidans* and  
910 *Acidithiobacillus thiooxidans* in arsenic bioleaching from soil. *Environ Geochem*  
911 *HLTH* 35(6), 727-733.
- 912 41. Demergasso C, Casamayor EO, Chong G, Galleguillos P, Escudero L, Pedros-Alió C.  
913 2004 Distribution of prokaryotic genetic diversity in athalassohaline lakes of the  
914 Atacama Desert, Northern Chile. *FEMS Microbiol Ecol* 48:57-69
- 915 42. Demergasso C, Escudero L, Casamayor EO, Chong G, Balague V, Pedros-Alió C. 2008  
916 Novelty and spatio-temporal heterogeneity in the bacterial diversity of hypersaline  
917 Lake Tebenquiche (Salar de Atacama). *Extremophiles* 12:491-504
- 918 43. Demergasso C, Dorador C, Meneses D, Blamey J, Cabrol N, Escudero L, Chong G.  
919 2010 Prokaryotic diversity pattern in high-altitude ecosystems of the Chilean  
920 Altiplano. *J Geophys Res* 115:G00D09
- 921 44. Dorador C. 2007. Microbial communities in high altitude altiplanic wetlands in  
922 northern Chile: phylogeny, diversity and function. Doctoral dissertation, Christian-

- 923 Albrechts-Universität, Kiel, Germany, p 166
- 924 45. Jiang H, Dong H, Yu B, Liu X, Li Y, Ji S, Zhang CL .2007. Microbial response to salinity  
925 change in Lake Chaka, a hypersaline lake on Tibetan plateau. *Environ Microbiol*  
926 9:2603–2621
- 927 46. Jung P, Baumann K, Lehnert LW, Samolov E, Achilles S, Schermer M, Wraase L,  
928 Eckhardt KU, Bader M, Leinweber P, Karsten U, Bendix J, Büdel B. 2020. Desert  
929 breath—How fog promotes a novel type of soil biocenosis, forming the coastal  
930 Atacama Desert’s living skin. *Geobiology* 18(1), 113-124.
- 931 47. Samolov E, Baumann K, Büdel B, Jung P, Leinweber P, Mikhailyuk T, Karsten U, Glaser  
932 K. 2020. Biodiversity of algae and cyanobacteria in biological soil crusts collected  
933 along a climatic gradient in Chile using an integrative approach. *Microorganisms*  
934 8(7), 1047.
- 935 48. Castro-Severyn J, Remonsellez F, Valenzuela SL, Salinas C, Fortt J, Aguilar P, Pardo-  
936 Esté C, Dorador C, Quatrini R, Molina F, Aguayo D, Castro-Nallar E, Saavedra CP.  
937 2017. Comparative genomics analysis of a new *Exiguobacterium* strain from Salar de  
938 Huasco reveals a repertoire of stress-related genes and arsenic resistance. *Front*  
939 *Microbiol* 8, 456.
- 940 49. Castro-Severyn J, Pardo-Esté C, Sulbaran Y, Cabezas C, Gariazzo V, Briones A,  
941 Morales N, Séveno M, Decourcelle, Salvétat N, Remonsellez F, Castro-Nallar E,  
942 Saavedra CP. 2019. Arsenic response of three altiplanic *Exiguobacterium* strains with  
943 different tolerance levels against the metalloids species: a proteomics study. *Front*  
944 *Microbiol* 10, 2161.
- 945 50. Idris H, Goodfellow M, Sanderson R, Asenjo JA, Bull AT. 2017. Actinobacterial rare  
946 biospheres and dark matter revealed in habitats of the Chilean Atacama Desert. *Sci*  
947 *Rep* 7(1), 1-11.
- 948 51. Agler MT, Ruhe J, Kroll S, Morhenn C, Kim ST, Weigel D, Kemen EM. 2016. Microbial  
949 hub taxa link host and abiotic factors to plant microbiome variation. *PLoS*  
950 *biology* 14(1), e1002352.
- 951 52. Kitahara R, Oyama K, Kawamura T, Mitsuhashi K, Kitazawa S, Yasunaga K, Sagara N,  
952 Fujimoto M, Terauchi, K. 2019. Pressure accelerates the circadian clock of  
953 cyanobacteria. *Sci Rep* 9(1), 1-8.
- 954 53. Crits-Christoph A, Gelsinger DR, Wierzchos J, Ravel J, Davila A, Casero MC,  
955 DiRuggiero J. 2016. Functional interactions of archaea, bacteria and viruses in a  
956 hypersaline endolithic community. *Env Microbiol* 18(6), 2064-2077.
- 957 54. Luton PE, Wayne JM, Sharp RJ, Riley PW. 2002. The *mcrA* gene as an alternative to  
958 16S rRNA in the phylogenetic analysis of methanogen populations in landfill.  
959 *Microbiology* 148(11), 3521-3530.
- 960 55. Sela-Adler M, Ronen Z, Herut B, Antler G, Vigderovich H, Eckert W, Sivan O. 2017.  
961 Co-existence of methanogenesis and sulfate reduction with common substrates in  
962 sulfate-rich estuarine sediments. *Front Microbiol* 8, 766.
- 963 56. Xiao KQ, Li LG, Ma LP, Zhang SY, Bao P, Zhang T, Zhu YG. 2016. Metagenomic analysis  
964 revealed highly diverse microbial arsenic metabolism genes in paddy soils with low-  
965 arsenic contents. *Env Poll* 211, 1-8.

- 966 57. Zhai W, Qin T, Li L, Guo T, Yin X, Khan MI, Hashmi MZ, Liu X, Tang X, Xu, J. 2020.  
967 Abundance and diversity of microbial arsenic biotransformation genes in the sludge  
968 of full-scale anaerobic digesters from a municipal wastewater treatment plant. *Env*  
969 *Int* 138, 105535.
- 970 58. Slyemi D, Bonnefoy V. 2012. How prokaryotes deal with arsenic. *Env Microbiol Rep*  
971 4(6), 571-586.
- 972 59. Jia Y, Huang H, Chen Z, Zhu YG. 2014. Arsenic uptake by rice is influenced by microbe-  
973 mediated arsenic redox changes in the rhizosphere. *Env Sci Tech* 48(2), 1001-1007.
- 974 60. Zhang SY, Zhao FJ, Sun GX, Su JQ, Yang XR, Li H, Zhu YG. 2015. Diversity and  
975 abundance of arsenic biotransformation genes in paddy soils from southern China.  
976 *Env Sci Tech* 49(7), 4138-4146.
- 977 61. Osman D, Cavet JS. 2010. Bacterial metal-sensing proteins exemplified by ArsR-  
978 SmtB family repressors. *Nat Prod Rep* 27(5), 668-680.
- 979 62. Shen Z, Luangtongkum T, Qiang Z, Jeon B, Wang L, Zhang Q. 2014. Identification of  
980 a novel membrane transporter mediating resistance to organic arsenic in  
981 *Campylobacter jejuni*. *Antimicrob Agents Chemother* 58(4), 2021-2029.
- 982 63. Fekih BI, Zhang C, Li YP, Zhao Y, Alwathnani HA, Saquib Q, Rensing C, Cervantes C.  
983 2018. Distribution of Arsenic Resistance Genes in Prokaryotes. *Front Microbiol* 9,  
984 2473.
- 985 64. Mateos LM, Villadangos AF, Alfonso G, Mourenza A, Marcos-Pascual L, Letek M,  
986 Pedre B, Messens J, Gil JA. 2017. The arsenic detoxification system in  
987 corynebacteria: basis and application for bioremediation and redox control. *Adv*  
988 *Appl Microbiol* 99, 103-137.
- 989 65. Shi K, Li C, Rensing C, Dai X, Fan X, Wang G. 2018. Efflux transporter ArsK is  
990 responsible for bacterial resistance to arsenite, antimonite, trivalent roxarsone, and  
991 methylarsenite. *App Env Microbiol* 84(24).
- 992 66. Xue S, Jiang X, Wu C, Hartley W, Qian Z, Luo X, Li W. 2020. Microbial driven iron  
993 reduction affects arsenic transformation and transportation in soil-rice system. *Env*  
994 *Poll* 260, 114010.
- 995 67. Oremland RS, Saltikov CW, Wolfe-Simon F, Stolz JF. 2009. Arsenic in the evolution of  
996 earth and extraterrestrial ecosystems. *J Geomicrobiol* 26(7), 522-536.
- 997 68. Mazumder P, Sharma SK, Taki K, Kalamdhad AS, Kumar M. 2020. Microbes involved  
998 in arsenic mobilization and respiration: a review on isolation, identification, isolates  
999 and implications. *Environ Geochem HLTH* 1-27.
- 1000 69. Lobb B, Kurtz DA, Moreno-Hagelsieb G, Doxey AC. 2015. Remote homology and the  
1001 functions of metagenomic dark matter. *Front Genet* 6, 234.
- 1002 70. da Costa WLO, Araújo CLDA, Días LM, Pereira LCDS, Alves JTC, Araujo FA, Folador EL,  
1003 Henriques I, Silva A, Folador ARC. 2018. Functional annotation of hypothetical  
1004 proteins from the *Exiguobacterium antarcticum* strain B7 reveals proteins involved  
1005 in adaptation to extreme environments, including high arsenic resistance. *PloS one*  
1006 13(6), e0198965.
- 1007 71. Antczak M, Michaelis M, Wass MN. 2019. Environmental conditions shape the  
1008 nature of a minimal bacterial genome. *Nat comm* 10(1), 1-13.

- 1009 72. Makarova KS, Wolf YI, Koonin EV. 2019. Towards functional characterization of  
1010 archaeal genomic dark matter. *Biochem Soc Trans* 47(1), 389-398.
- 1011 73. Cai L, Liu G, Rensing C, Wang G. 2009. Genes involved in arsenic transformation and  
1012 resistance associated with different levels of arsenic-contaminated soils. *BMC*  
1013 *Microbiol* 9(1), 1-11.
- 1014 74. Chen SC, Sun GX, Yan Y, Konstantinidis KT, Zhang SY, Deng Y, Li XM, Cui HL, Musat F,  
1015 Popp D, Rosen B, Zhu YG. 2020. The Great Oxidation Event expanded the genetic  
1016 repertoire of arsenic metabolism and cycling. *PNAS* 117(19), 10414-10421.
- 1017 75. Delmont TO, Quince C, Shaiber A, Esen ÖC, Lee ST, Rappé MS, McLellan S, Lückner S,  
1018 Eren AM. 2018. Nitrogen-fixing populations of Planctomycetes and Proteobacteria  
1019 are abundant in surface ocean metagenomes. *Nat Microbiol* 3(7), 804-813.
- 1020 76. Leema JM, Kirubakaran R, Vinithkumar NV, Dheenan PS, Karthikayulu S. 2010. High  
1021 value pigment production from *Arthrospira* (Spirulina) platensis cultured in  
1022 seawater. *Bioresour Technol* 101(23), 9221-9227.
- 1023 77. Sorokin DY, Muntyan MS, Panteleeva AN, Muyzer G. 2012. *Thioalkalivibrio*  
1024 *sulfidiphilus* sp. nov., a haloalkaliphilic, sulfur-oxidizing gammaproteobacterium  
1025 from alkaline habitats. *Int J Syst Evol Microbiol* 62(8), 1884-1889.
- 1026 78. Purcell AM, Mikucki JA, Achberger AM, Alekhina IA, Barbante C, Christner BC, Ghosh  
1027 D, Michaud A, Mitchell A, Priscu J, Scherer R, Skidmore M, Vick-Majors TJ. 2014.  
1028 Microbial sulfur transformations in sediments from Subglacial Lake Whillans. *Front*  
1029 *Microbiol* 5, 594.
- 1030 79. Zargar K, Hoefft S, Oremland R, Saltikov CW. 2010. Identification of a novel arsenite  
1031 oxidase gene, *arxA*, in the haloalkaliphilic, arsenite-oxidizing bacterium  
1032 *Alkalilimnicola ehrlichii* strain MLHE-1. *J Bacteriol* 192(14), 3755-3762.
- 1033 80. Andrews S. 2010. FastQC a quality-control tool for high-throughput sequence data  
1034 [http://www. Bioinformaticsbabraham. ac. uk/projects/fastqc](http://www.Bioinformaticsbabraham.ac.uk/projects/fastqc).
- 1035 81. Bolger AM, Lohse M, Usadel B. 2014. Trimmomatic: a flexible trimmer for Illumina  
1036 sequence data. *Bioinformatics* 30(15), 2114–2120.
- 1037 82. Schmieder R, Edwards R. 2011. Quality control and preprocessing of metagenomic  
1038 datasets. *Bioinformatics* 27(6), 863-864.
- 1039 83. Gruber-Vodicka HR, Seah BK, Pruesse E. 2020. phyloFlash: Rapid Small-Subunit rRNA  
1040 Profiling and Targeted Assembly from Metagenomes. *Msystems*, 5(5).
- 1041 84. Quast C, Pruesse E, Yilmaz P, Gerken J, Schweer T, Yarza P, Peplies J, Glöckner FO.  
1042 2012. The SILVA ribosomal RNA gene database project: improved data processing  
1043 and web-based tools. *Nucleic Acids Res* 41(D1), D590-D596.
- 1044 85. R Core Team. 2018. R: A language and environment for statistical computing. R  
1045 Foundation for Statistical Computing, Vienna, Austria. URL [https://www.R-](https://www.R-project.org/)  
1046 [project.org/](https://www.R-project.org/).
- 1047 86. RStudio Team. 2016. RStudio: Integrated development for R. Boston, MA: RStudio  
1048 Inc. Retrieved from <http://www.rstudio.com/>
- 1049 87. Callahan B, McMurdie P, Rosen M, Han A, Johnson A, Holmes S. 2016. DADA2: High-  
1050 resolution sample inference from Illumina amplicon data. *Nat Methods* 13, 581–  
1051 583.



- 1052 88. Wang Q, Garrity GM, Tiedje JM, Cole JR. 2007. Naive Bayesian classifier for rapid  
1053 assignment of rRNA sequences into the new bacterial taxonomy. *Appl Environ*  
1054 *Microbiol* 73(16), 5261-5267.
- 1055 89. Love M, Huber W, Anders S. 2014. Moderated estimation of fold change and  
1056 dispersion for RNA-seq data with DESeq2. *Genome Biol* 15, 550.
- 1057 90. Wright ES. 2016. Using DECIPHER v2. 0 to analyze big biological sequence data in R.  
1058 *R Journal* 8(1).
- 1059 91. Price MN, Dehal PS, Arkin AP. 2009. FastTree: computing large minimum evolution  
1060 trees with profiles instead of a distance matrix. *Mol Biol Evol* 26(7), 1641-1650.
- 1061 92. McMurdie PJ, Holmes S. 2013. phyloseq: an R package for reproducible interactive  
1062 analysis and graphics of microbiome census data. *PloS one* 8(4), e61217.
- 1063 93. Andersen KS, Kirkegaard RH, Karst SM, Albertsen M. 2018. ampvis2: an R package to  
1064 analyse and visualise 16S rRNA amplicon data. *BioRxiv* 299537.
- 1065 94. Wickham H. 2016. ggplot2: Elegant Graphics for Data Analysis. Springer-Verlag New  
1066 York.
- 1067 95. Lahti L, Shetty S, Blake T, Salojarvi J. 2017. Tools for microbiome analysis in R.  
1068 *Version*, 1, 10013.
- 1069 96. Gentleman R, Carey V, Huber W, Hahne F. 2011. Genefilter: Methods for filtering  
1070 genes from microarray experiments. R package version, 1(0).
- 1071 97. Kurtz ZD, Müller CL, Miraldi ER, Littman DR, Blaser MJ, Bonneau RA. 2015. Sparse  
1072 and compositionally robust inference of microbial ecological networks. *PLoS*  
1073 *Comput Biol* 11(5), e1004226.
- 1074 98. Schloerke B, Crowley J, Cook D, Briatte F, Marbach M, Thoen E, Elberg A, Toomet O,  
1075 Crowley J, Hofmann H, Wickman H. 2018. GGally: Extension to 'ggplot2'. R package  
1076 version 1.4.0. <https://CRAN.R-project.org/package=GGally>.
- 1077 99. Overbeek R, Olson R, Pusch GD, Olsen GJ, Davis JJ, Disz T, Edwards R, Gerdes S,  
1078 Parrello B, Shukla M, Vonstein V, Wattam A, Xia F, Stevens R. 2014. The SEED and  
1079 the Rapid Annotation of microbial genomes using Subsystems Technology (RAST).  
1080 *Nucleic Acids Res* 42(D1), D206-D214.
- 1081 100. Silva GGZ, Green KT, Dutilh BE, Edwards RA. 2016. SUPER-FOCUS: a tool for agile  
1082 functional analysis of shotgun metagenomic data. *Bioinformatics* 32(3), 354-361.
- 1083 101. Buchfink B, Xie C, Huson DH. 2015. Fast and sensitive protein alignment using  
1084 DIAMOND. *Nat Methods* 12(1), 59-60.
- 1085 102. Parks DH, Tyson GW, Hugenholtz P, Beiko RG. 2014. STAMP: statistical analysis of  
1086 taxonomic and functional profiles. *Bioinformatics* 30(21), 3123-3124.
- 1087 103. Li D, Luo R, Liu CM, Leung CM, Ting HF, Sadakane K, Yamashita H, Lam TW. 2016.  
1088 MEGAHIT v1.0: a fast and scalable metagenome assembler driven by advanced  
1089 methodologies and community practices. *Methods* 102, 3-11.
- 1090 104. Mikheenko A, Saveliev V, Gurevich A. 2016. MetaQUAST: evaluation of metagenome  
1091 assemblies. *Bioinformatics* 32(7), 1088-1090.
- 1092 105. Seemann T. 2014. Prokka: rapid prokaryotic genome annotation. *Bioinformatics*  
1093 30(14), 2068-2069.
- 1094 106. Langmead B, Salzberg SL. 2012. Fast gapped-read alignment with Bowtie 2. *Nat*  
1095 *Methods* 9(4), 357.

- 1096 107. Li H, Handsaker B, Wysoker A, Fennell T, Ruan J, Homer N, Marth G, Abecasis G,  
1097 Durbin R. 2009. The sequence alignment/map format and SAMtools. *Bioinformatics*  
1098 25(16), 2078-2079.
- 1099 108. Eren AM, Esen ÖC, Quince C, Vineis JH, Morrison HG, Sogin ML, Delmont TO. 2015.  
1100 Anvi'o: an advanced analysis and visualization platform for 'omics data. *PeerJ* 3,  
1101 e1319.
- 1102 109. Hyatt D, Chen GL, LoCascio PF, Land ML, Larimer FW, Hauser LJ. 2010. Prodigal:  
1103 prokaryotic gene recognition and translation initiation site identification. *BMC*  
1104 *Bioinformatics* 11(1), 119.
- 1105 110. Eddy SR. 2011. Accelerated profile HMM searches. *PLoS Comput Biol* 7(10),  
1106 e1002195.
- 1107 111. Tatusov RL, Galperin MY, Natale DA, Koonin EV. 2000. The COG database: a tool for  
1108 genome-scale analysis of protein functions and evolution. *Nucleic Acids Res* 28(1),  
1109 33-36.
- 1110 112. De Anda V, Zapata-Peñasco I, Poot-Hernandez AC, Eguiarte LE, Contreras-Moreira B,  
1111 Souza V. 2017. MEBS, a software platform to evaluate large (meta) genomic  
1112 collections according to their metabolic machinery: unraveling the sulfur cycle.  
1113 *GigaScience* 6(11), gix096.
- 1114 113. Anders S, Pyl PT, Huber W. 2015. HTSeq—a Python framework to work with high-  
1115 throughput sequencing data. *Bioinformatics* 31(2), 166-169.
- 1116 114. Aubry S, Kelly S, Kümpers BM, Smith-Unna RD, Hibberd JM. 2014. Deep evolutionary  
1117 comparison of gene expression identifies parallel recruitment of trans-factors in two  
1118 independent origins of C4 photosynthesis. *PLoS Genet* 10(6), e1004365.
- 1119 115. Kolde R, Kolde MR. 2015. Package 'pheatmap'. *R Package* 1(7), 790.
- 1120 116. Katoh K, Misawa K, Kuma KI, Miyata T. 2002. MAFFT: a novel method for rapid  
1121 multiple sequence alignment based on fast Fourier transform. *Nucleic Acids Res*  
1122 30(14), 3059-3066.
- 1123 117. Alneberg J, Bjarnason BS, De Bruijn I, Schirmer M, Quick J, Ijaz UZ, Lahti L, Loman N,  
1124 Andersson A, Quince C. 2014. Binning metagenomic contigs by coverage and  
1125 composition. *Nat Methods* 11(11), 1144-1146.
- 1126 118. Parks DH, Imelfort M, Skennerton CT, Hugenholtz P, Tyson GW. 2015. CheckM:  
1127 assessing the quality of microbial genomes recovered from isolates, single cells, and  
1128 metagenomes. *Genome Res* 25(7), 1043-1055.
- 1129 119. Chaumeil PA, Mussig AJ, Hugenholtz P, Parks DH. 2020. GTDB-Tk: a toolkit to classify  
1130 genomes with the Genome Taxonomy Database. *Bioinformatics* 36(6), btz848.
- 1131 120. Parks DH, Chuvochina M, Chaumeil PA, Rinke C, Mussig AJ, Hugenholtz P. 2020. A  
1132 complete domain-to-species taxonomy for Bacteria and Archaea. *Nat Biotech* 1-8.
- 1133 121. Kanehisa M, Sato Y, Kawashima M, Furumichi M, Tanabe M. 2016. KEGG as a  
1134 reference resource for gene and protein annotation. *Nucleic Acids Res* 44(D1), D457-  
1135 D462.
- 1136 122. Aramaki T, Blanc-Mathieu R, Endo H, Ohkubo K, Kanehisa M, Goto S, Ogata H. 2020.  
1137 KofamKOALA: KEGG ortholog assignment based on profile HMM and adaptive score  
1138 threshold. *Bioinformatics* 36(7), 2251-2252.



- 1139 123. Muto A, Kotera M, Tokimatsu T, Nakagawa Z, Goto S, Kanehisa M. 2013. Modular  
1140 architecture of metabolic pathways revealed by conserved sequences of reactions.  
1141 J Chem Inf Model 53(3), 613-622.
- 1142 124. Bastian M, Heymann S, Jacomy M. 2009. Gephi: an open-source software for  
1143 exploring and manipulating networks. ICWSM 2, 361–362.
- 1144 125. Bowers RM, Kyrpides NC, Stepanauskas R, Harmon-Smith M, Doud D, Reddy TBK,  
1145 Schulz F, Jarett J, Rivers A, Eloie-Fadrosch EA, Tringe SG, Ivanova NN, Copeland A, Clum  
1146 A, Becraft ED, Malmstrom RR, Birre B, Podar M, Bork P, Weinstock GM, Garrity G,  
1147 Dodsworth JA, Yooseph S, Sutton G, Glöckner F, Gilbert J, Nelson W, Hallam S,  
1148 Jungbluth SP, Ettema TJ, Tighe S, Konstantinidis KT, Liu WT, Baker BJ, Rattei T, Eisen  
1149 JA, Hedlund B, McMahon KD, Fierer N, Knight R, Finn R, Cochrane G, Karsch-Mizrachi  
1150 I, Tyson GW, Rinke C, Lapidus A, Meyer F, Yilmaz P, Parks D, Eren AM, Schriml L,  
1151 Hugenholtz P, Woyke T. 2017. Minimum information about a single amplified  
1152 genome (MISAG) and a metagenome-assembled genome (MIMAG) of bacteria and  
1153 archaea. Nat Biotechnol 35(8), 725-731.

1154

1155

#### 1156 **SUPPLEMENTARY MATERIAL**

1157 **Supplementary Table S1.** Relative abundance of all detected phyla in the five SH  
1158 communities.

1159 **Supplementary Table S2.** Statistical values of the SH co-assembly, representing the five  
1160 metagenomes.

1161 **Supplementary Table S3.** Statistical evaluation of enriched functional categories (SEED  
1162 subsystem 1) in each of the five communities regarding the rest according to Welch's t-test.

1163 **Supplementary Table S4.** Indexes of relative abundance and detection of each recovered  
1164 MAG across the five SH metagenomes.

1165 **Supplementary Table S5.** Completion index of all detected KEGG modules each analyzed  
1166 MAG.

1167 **Supplementary Table S6.** Presence and copy number of arsenic resistance related genes in  
1168 each analyzed MAG.

1169

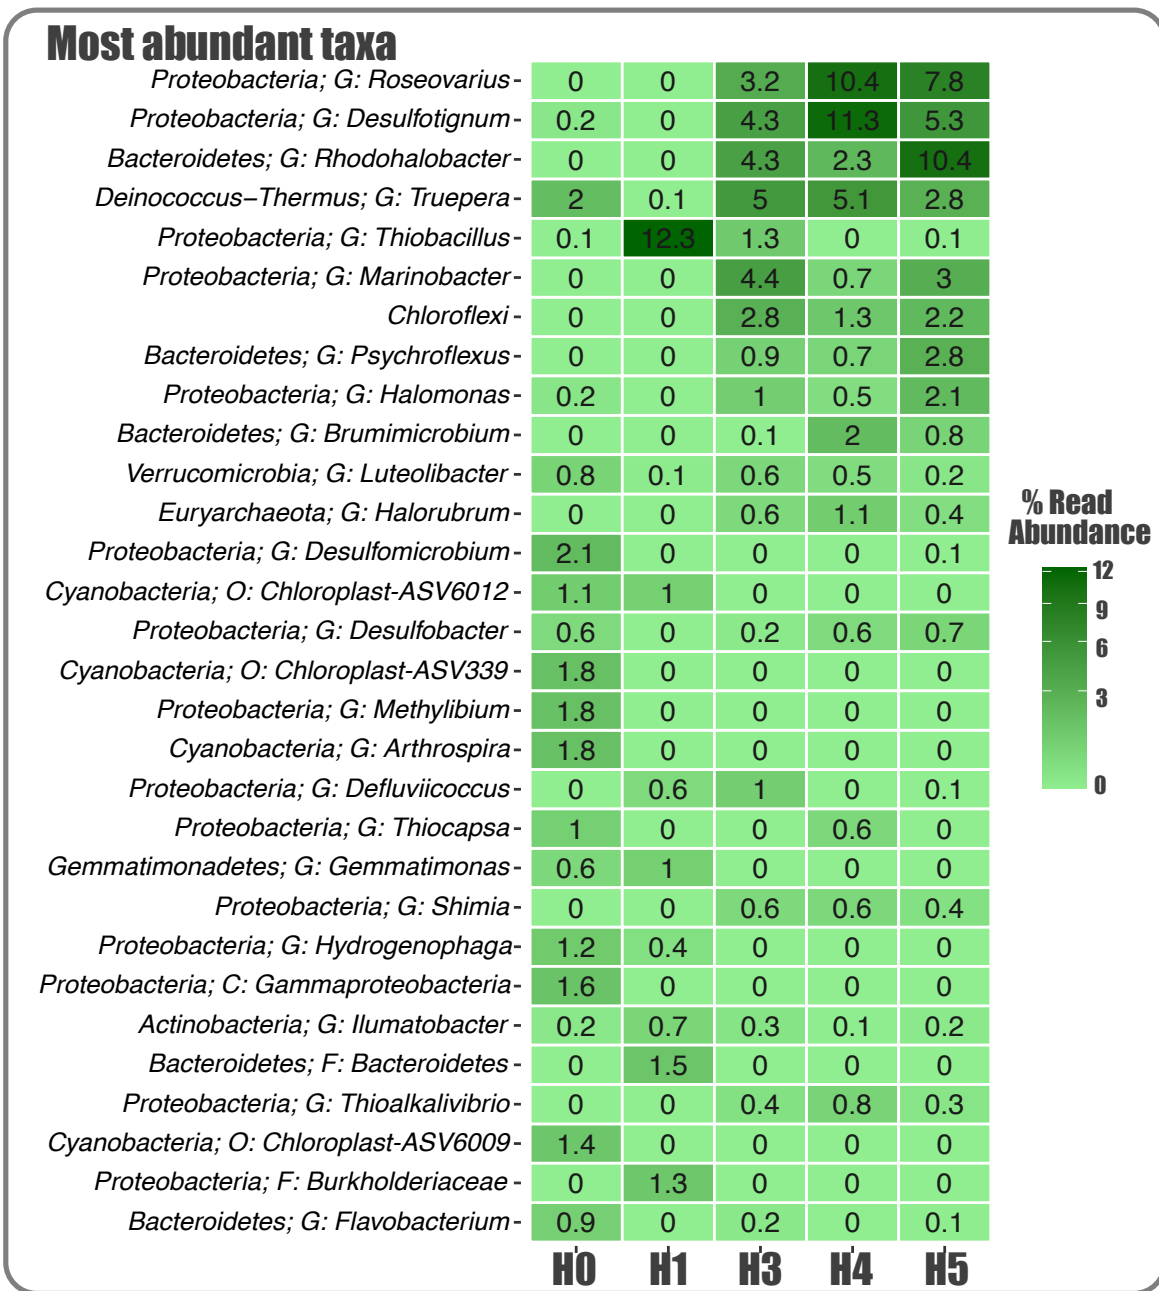

1170

1171 **Supplementary Figure S1.** Composition and structure of SH bacterial communities.  
 1172 Heatmap showing the 30 most abundant ASVs (bacterial lineages). Taxonomic is shown at  
 1173 the phylum rank plus the best hit available (C: class; O: order; F: family; G: genus).

1174

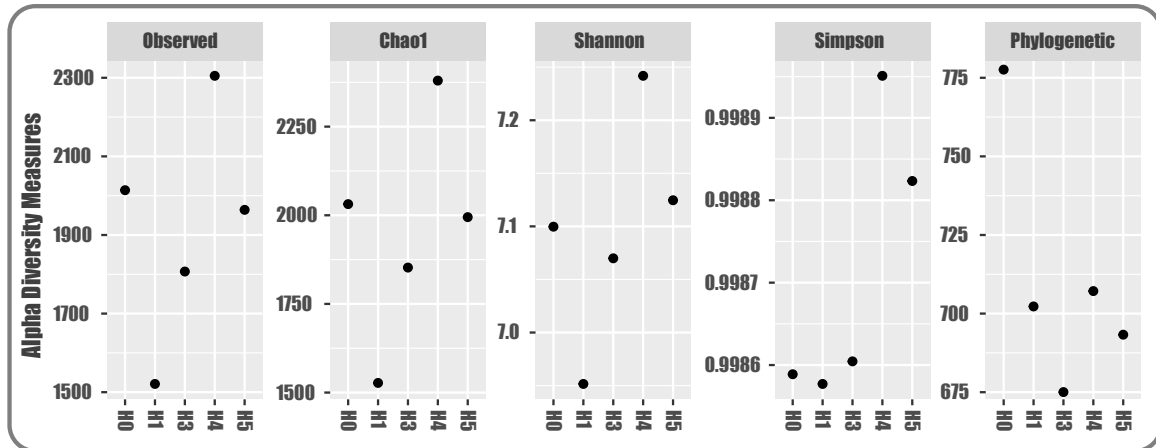

1175

1176 **Supplementary Figure S2.** Alpha diversity indices for the five SH communities.

1177

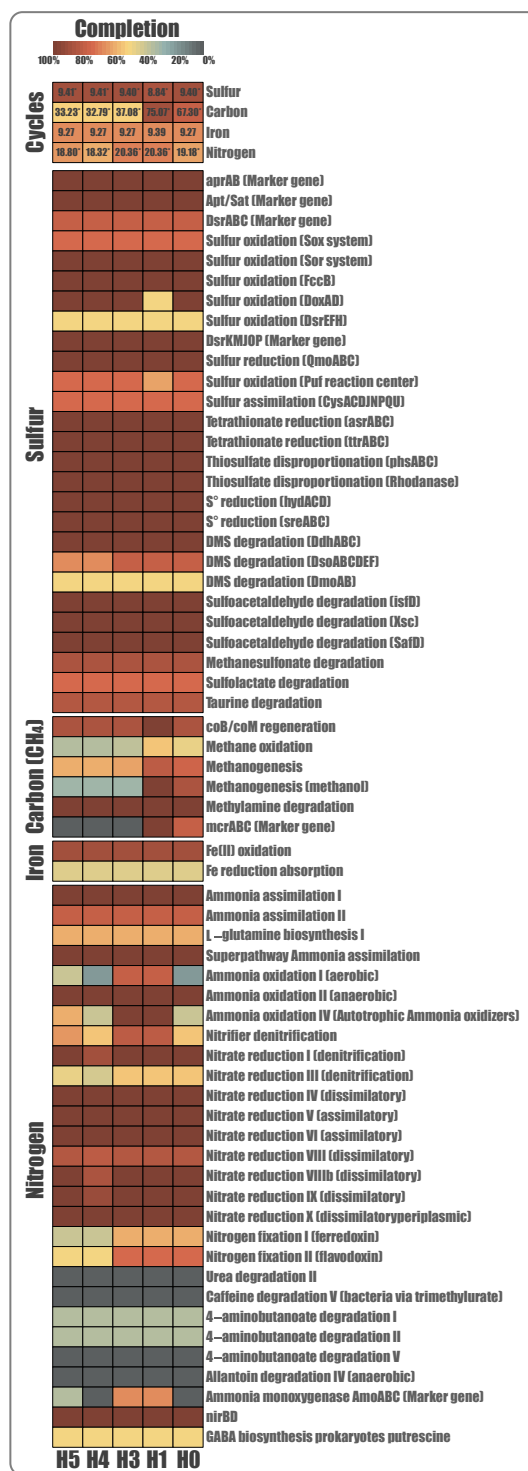

1178

1179 **Supplementary Figure S3.** MEBS analysis heatmap displaying the completeness of N, Fe, S  
 1180 and CH<sub>4</sub> pathways: as a whole (first top section) and particular reactions (bottom four  
 1181 sections). The color gradient shows the percentage of completion for each pathway (from  
 1182 lowest to highest) and the values at the top section represent the corresponding MEBS  
 1183 score (\* FDR ≤ 0.01).  
 1184



bioRxiv preprint doi: <https://doi.org/10.1101/2021.04.13.439755>; this version posted April 16, 2021. The copyright holder for this preprint (which was not certified by peer review) is the author/funder, who has granted bioRxiv a license to display the preprint in perpetuity. It is made available under a [CC-BY-NC 4.0 International license](https://creativecommons.org/licenses/by-nc/4.0/).

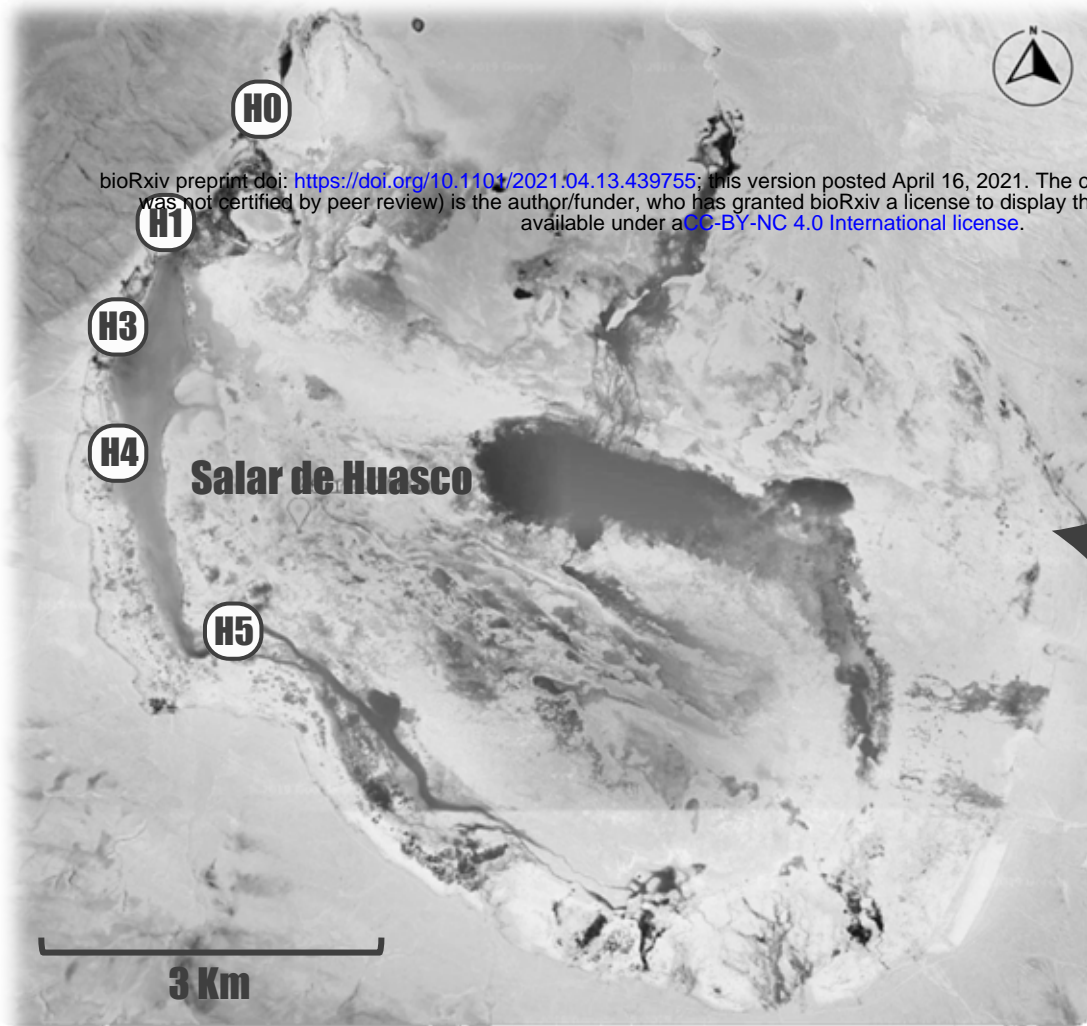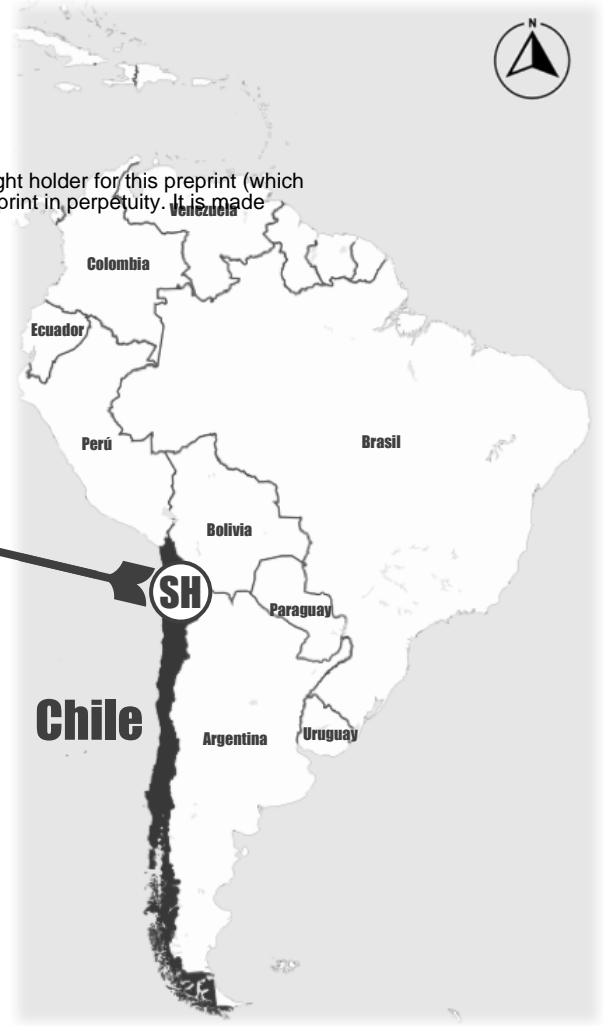

**H5**  
[As] 321 mg/kg  
Salinity 84.5%  
pH 9.2  
Temp 24.3°C  
Altitud 3,781 masl

**H4**  
[As] 155 mg/kg  
Salinity 77.2%  
pH 8.4  
Temp 18.8°C  
Altitud 3,787 masl

**H3**  
[As] 49.2 mg/kg  
Salinity 2.2%  
pH 8.5  
Temp 19.9°C  
Altitud 3,783 masl

**H1**  
[As] 16.3 mg/kg  
Salinity 8.1%  
pH 9.4  
Temp 14°C  
Altitud 3,785 masl

**H0**  
[As] 9 mg/kg  
Salinity 11.9%  
pH 8.8  
Temp 14.6°C  
Altitud 3,792 masl

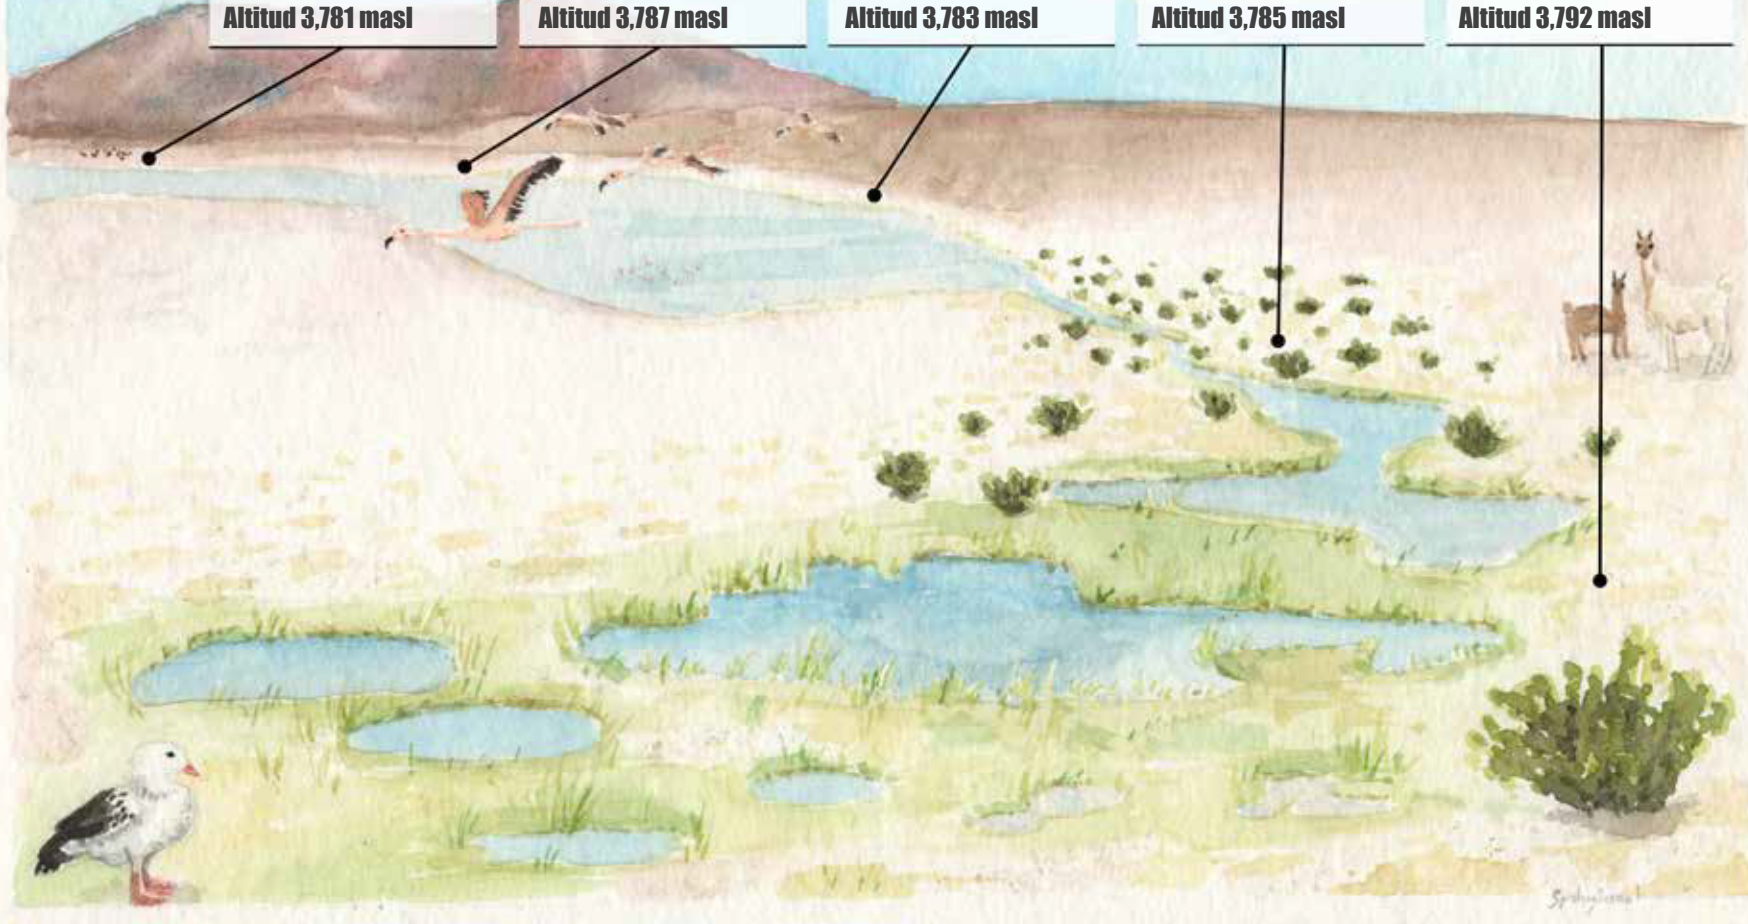

**(A)**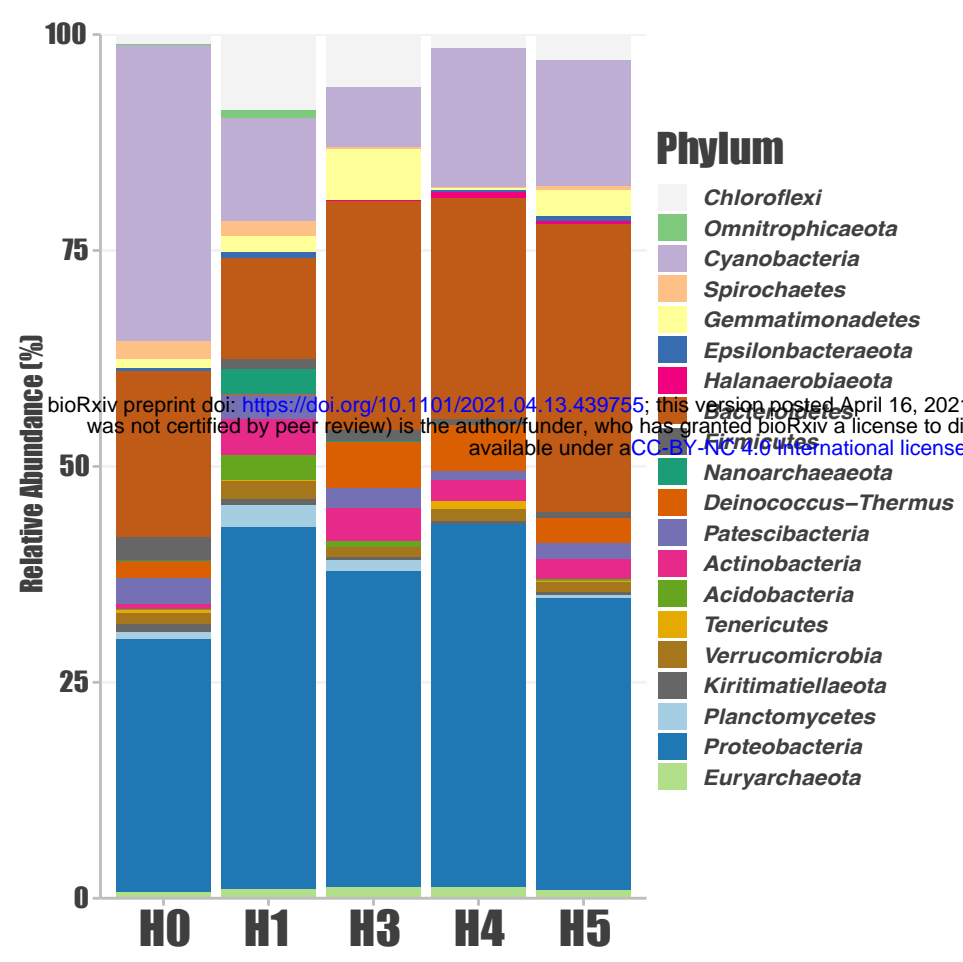**(B)**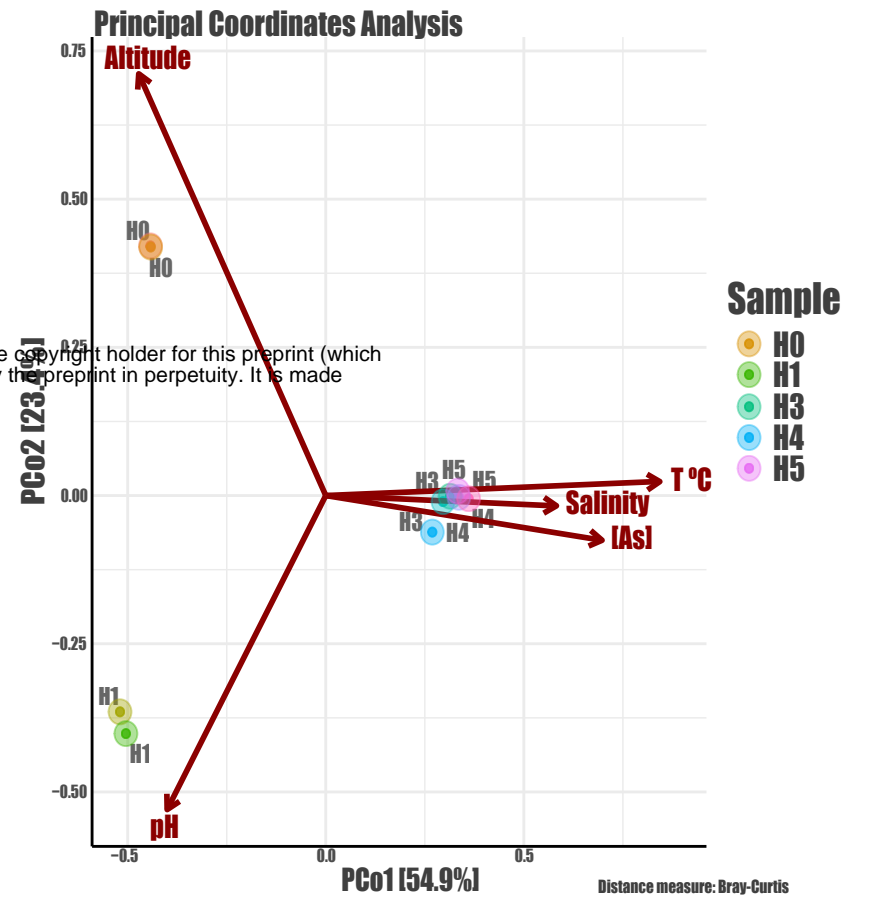**(C)**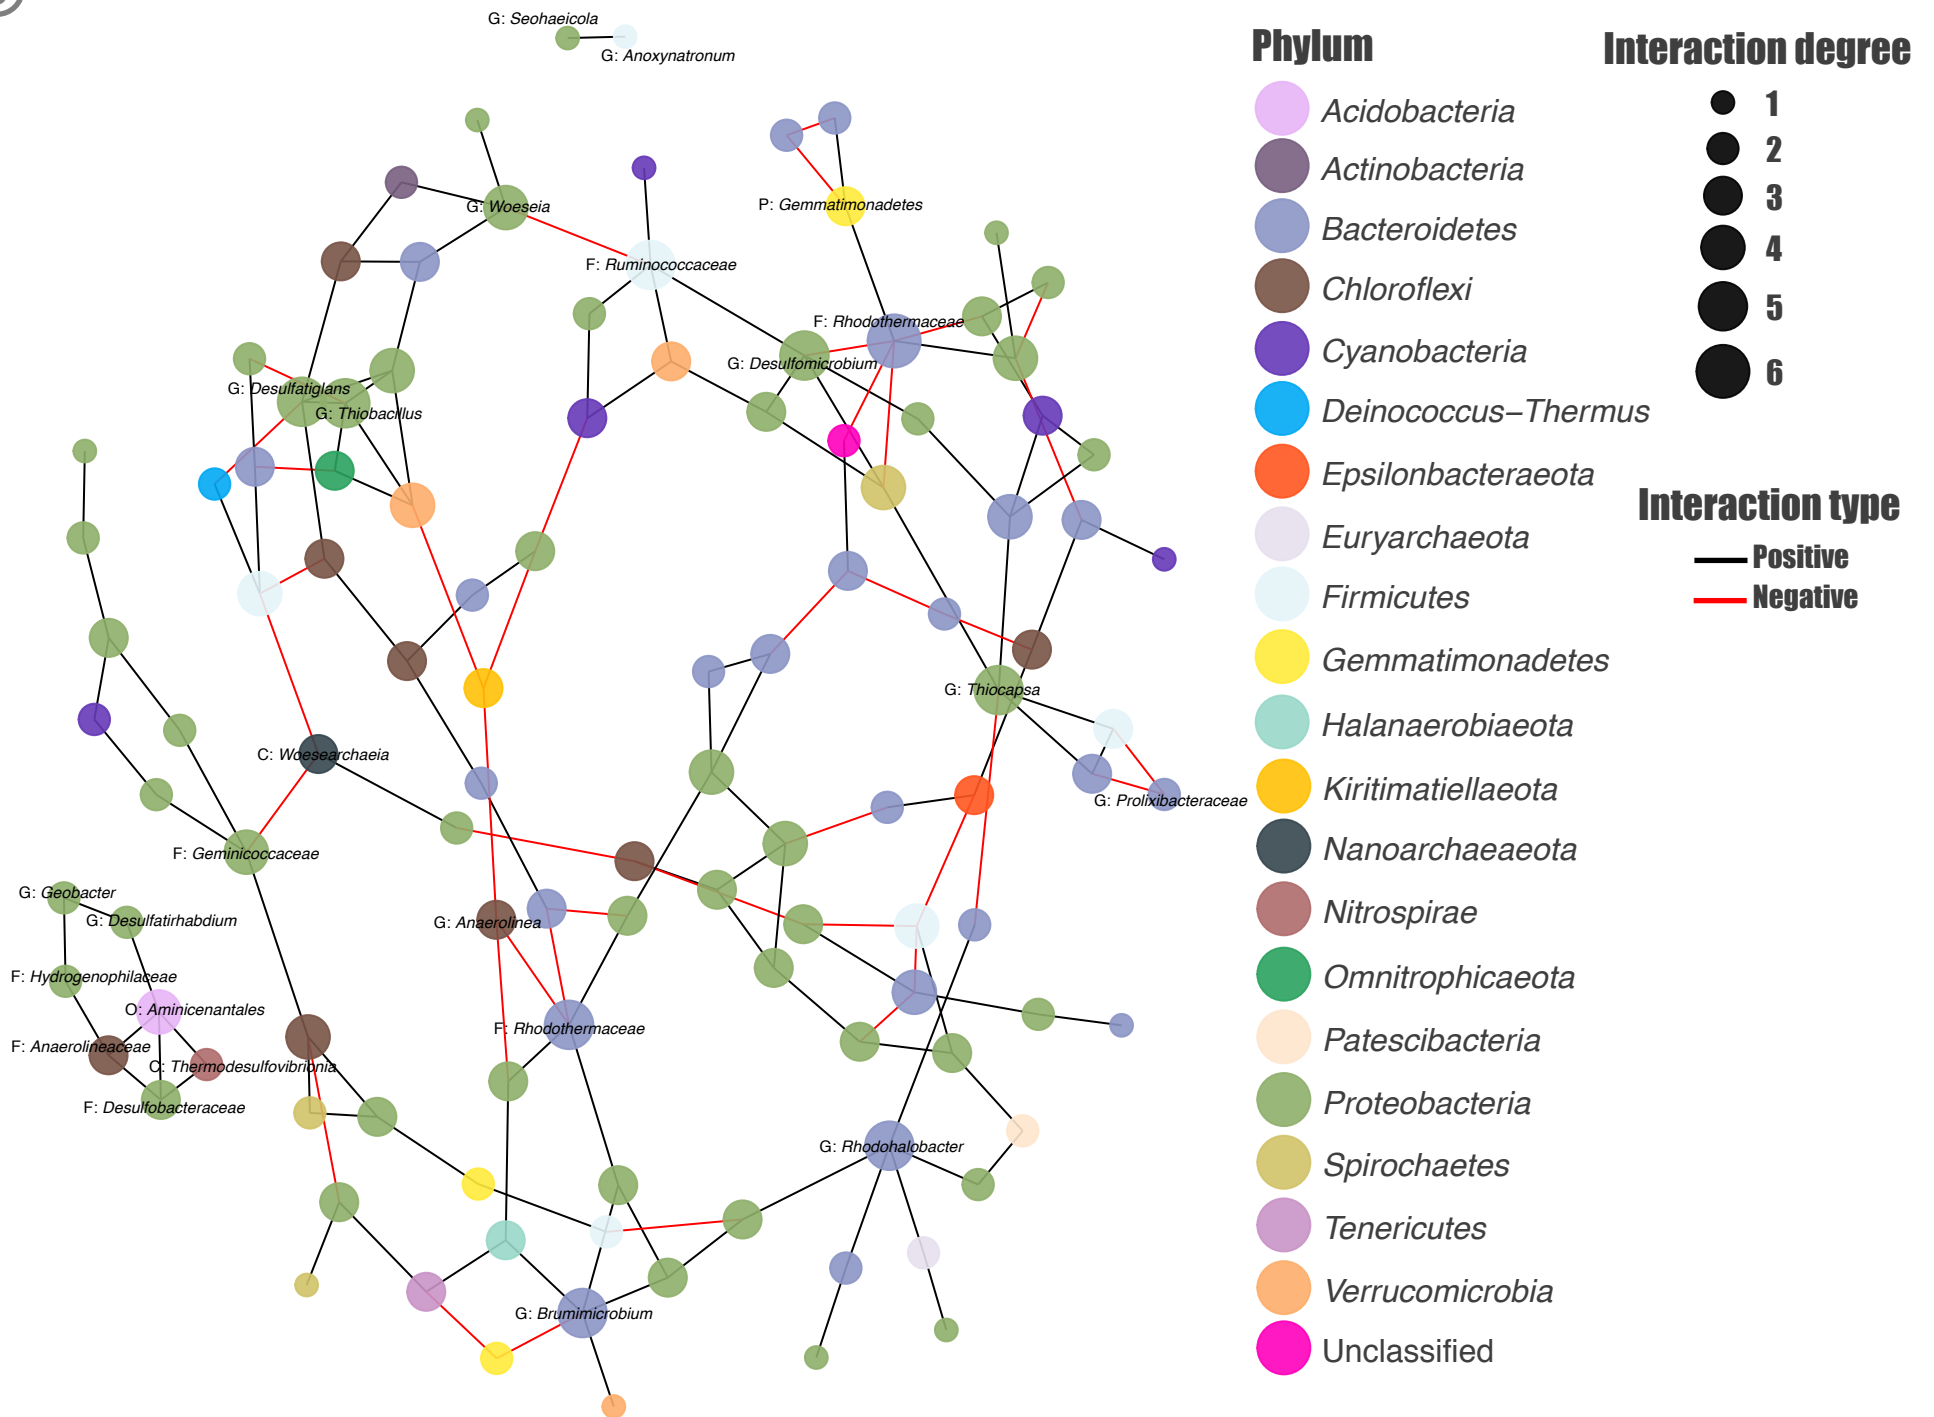



**A**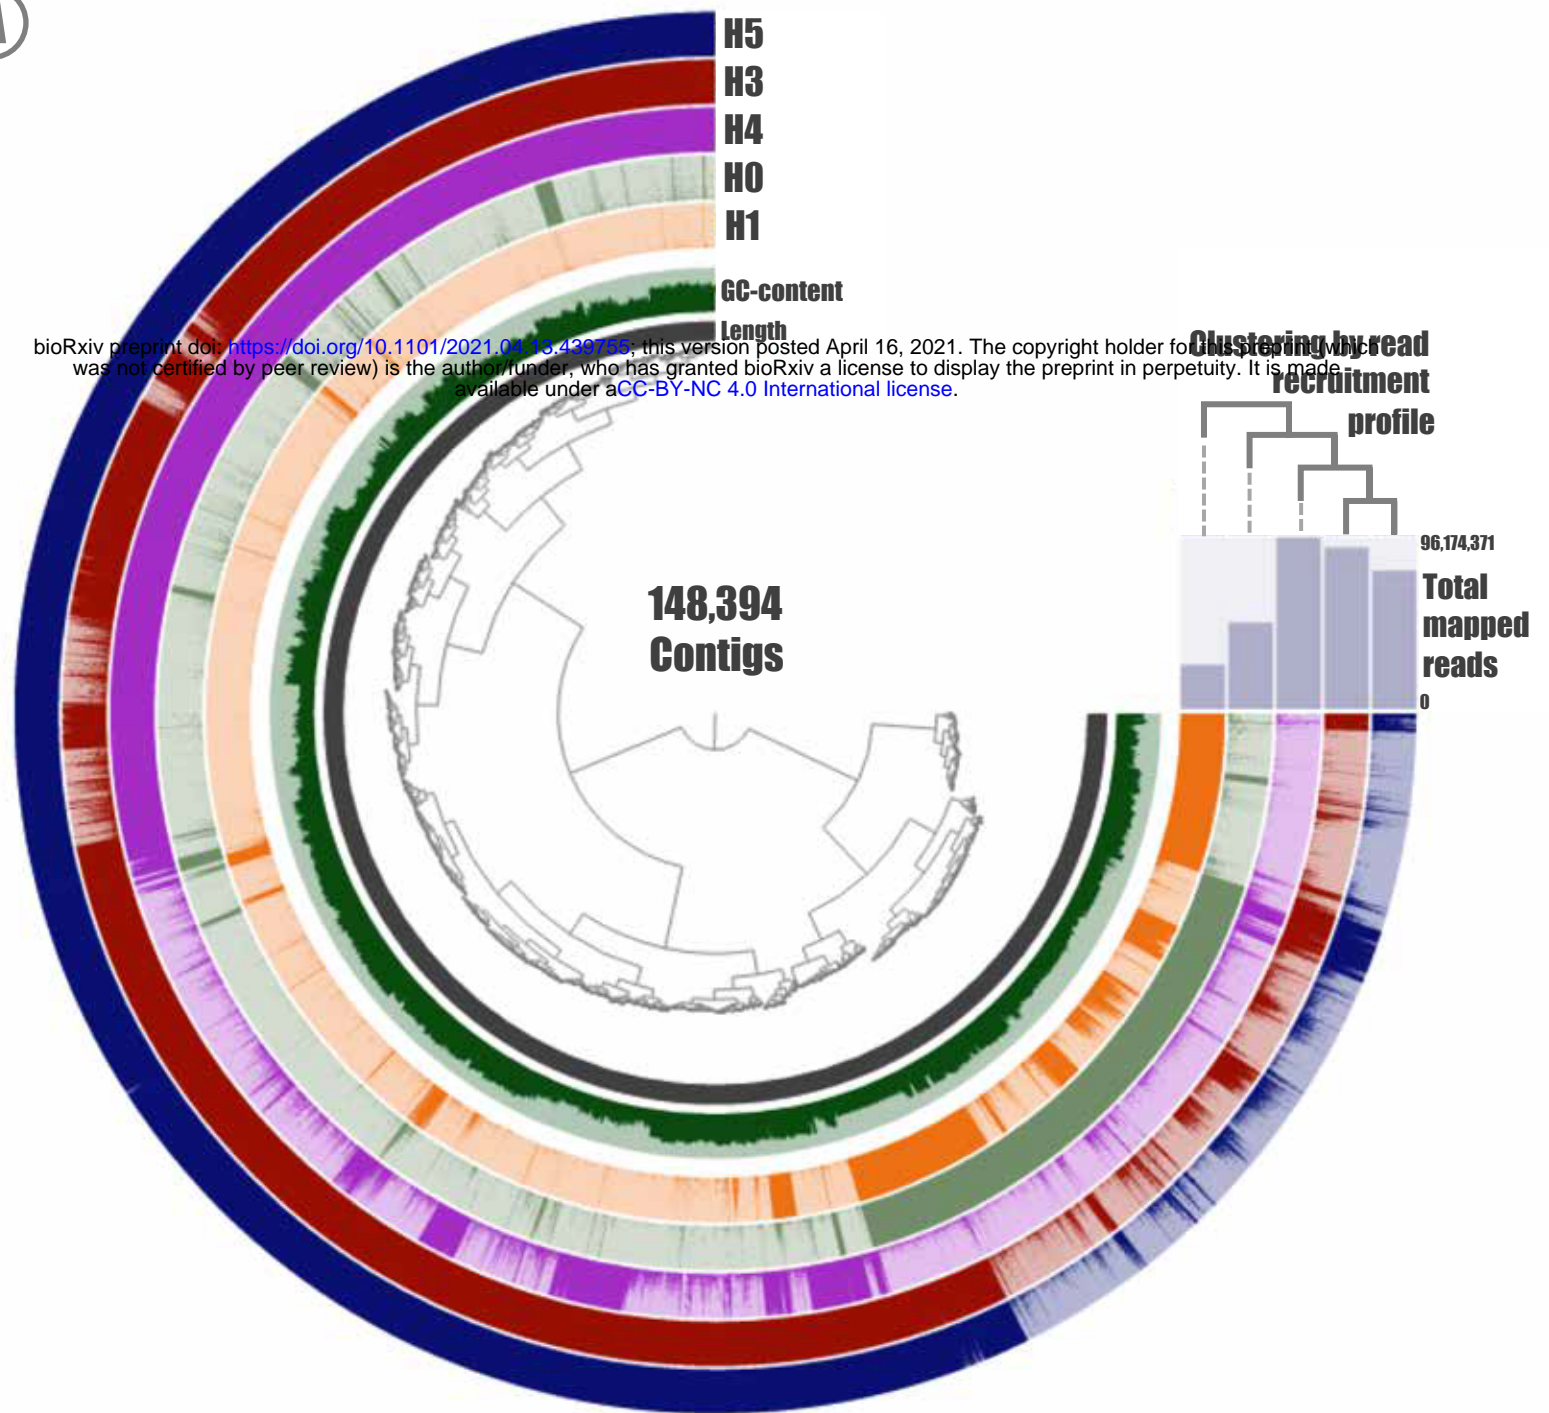**B**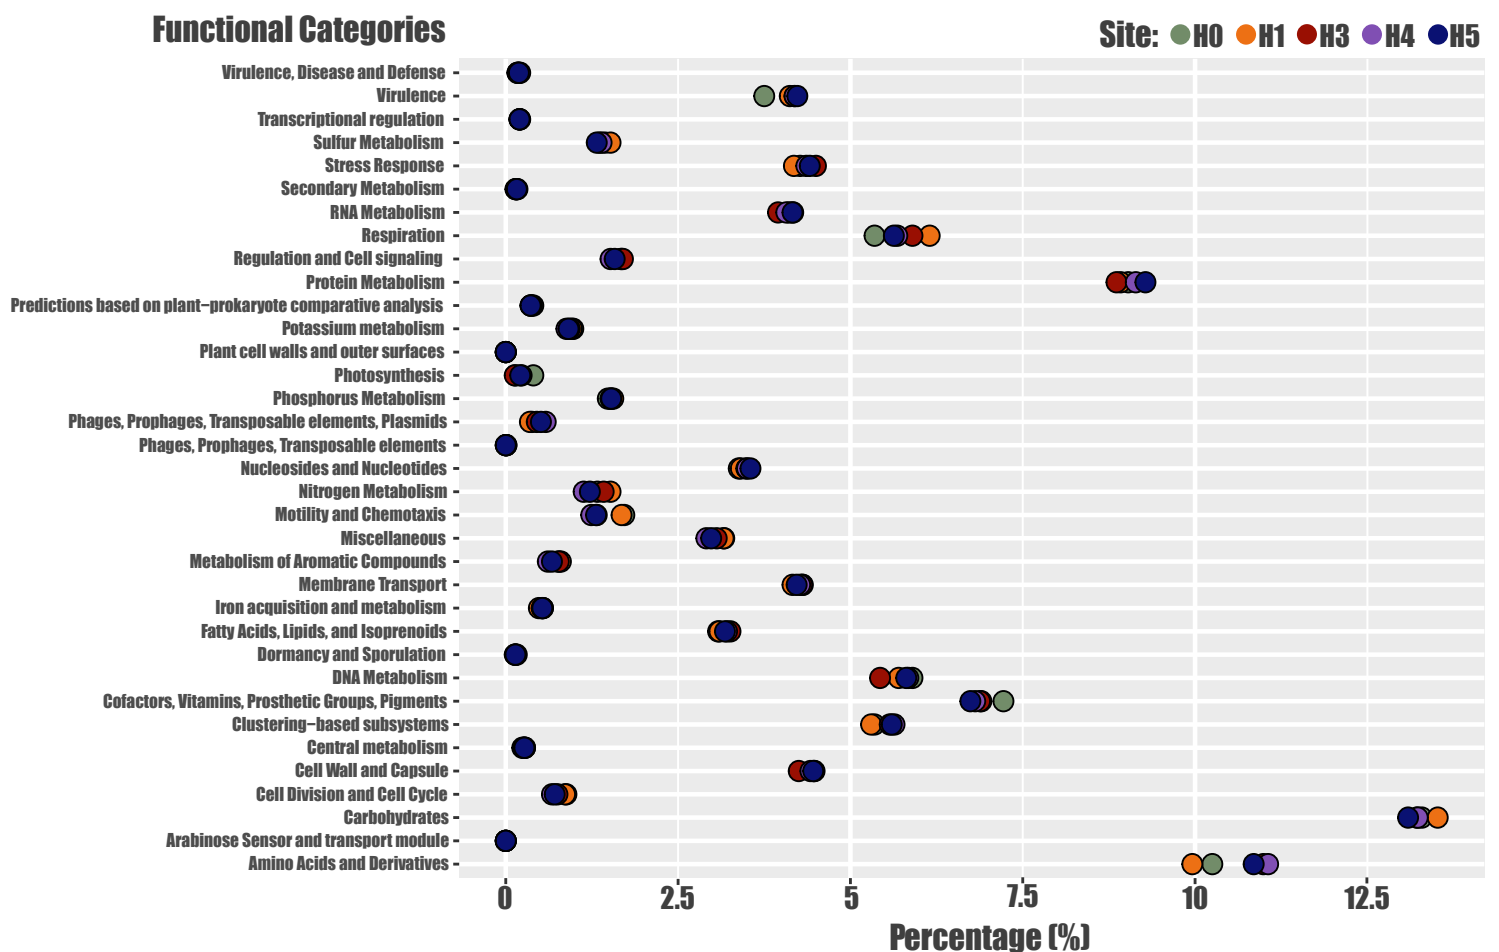



# Arsenic Metabolism Genes

|             |           |           |           |           |           |
|-------------|-----------|-----------|-----------|-----------|-----------|
| <i>arsR</i> | 6142.15   | 4214.04   | 12356.33  | 18499.32  | 13750.63  |
| <i>arsC</i> | 1327.42   | 1188.22   | 2117.04   | 2345.06   | 2057.75   |
| <i>acr3</i> | 1099.45   | 698.09    | 2375.33   | 2003.96   | 2183.94   |
| <i>arsM</i> | 427.13    | 495.38    | 1491.54   | 2215.36   | 1827.64   |
| <i>arsB</i> | 367.57    | 200.46    | 583.55    | 542.77    | 487.89    |
| <i>arsD</i> | 259.69    | 57.08     | 534.59    | 682.07    | 600.08    |
| <i>arsJ</i> | 202.04    | 75.23     | 531.96    | 717.95    | 480.64    |
| <i>arsA</i> | 601.44    | 93.67     | 337.78    | 438.65    | 338.12    |
| <i>aoxB</i> | 113.32    | 0.89      | 519.98    | 613.91    | 485.76    |
| <i>arsP</i> | 2.14      | 0.60      | 178.54    | 564.49    | 341.63    |
| <i>arsH</i> | 265.30    | 92.76     | 217.13    | 253.17    | 237.18    |
| <i>aioB</i> | 46.54     | 50.63     | 153.38    | 171.91    | 134.68    |
| <i>arxB</i> | 65.25     | 2.50      | 205.48    | 105.97    | 147.89    |
| <i>aoxA</i> | 0.00      | 0.00      | 156.08    | 200.40    | 165.10    |
| <i>aioA</i> | 110.20    | 86.16     | 106.81    | 114.45    | 84.01     |
| <i>arxA</i> | 177.41    | 2.07      | 158.71    | 35.78     | 92.44     |
| <i>arxR</i> | 240.74    | 0.00      | 0.00      | 0.00      | 0.00      |
| <i>arrA</i> | 8.58      | 60.09     | 0.00      | 0.00      | 0.00      |
|             | <b>H0</b> | <b>H1</b> | <b>H3</b> | <b>H4</b> | <b>H5</b> |

**Normalized reads**

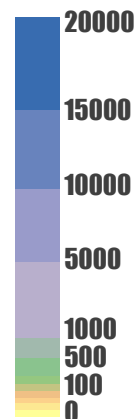

**Mechanism**

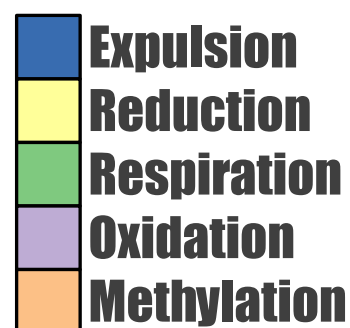

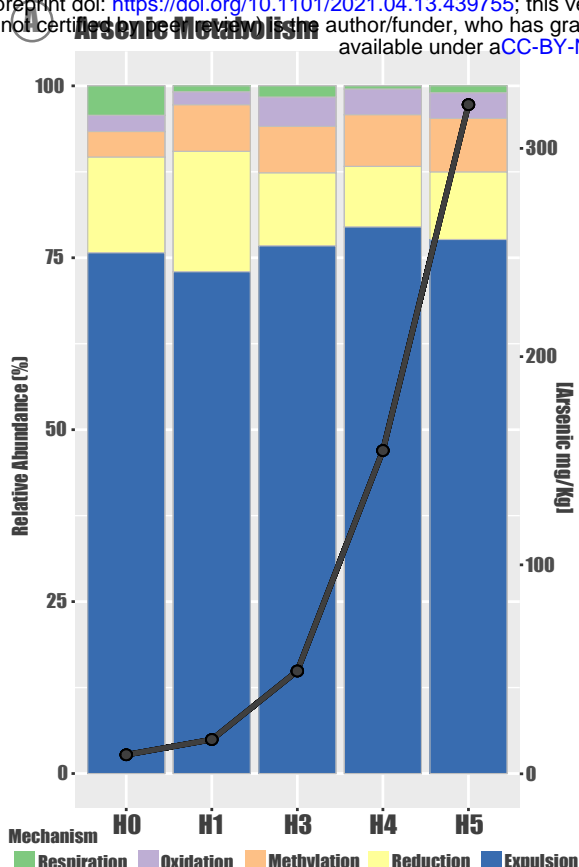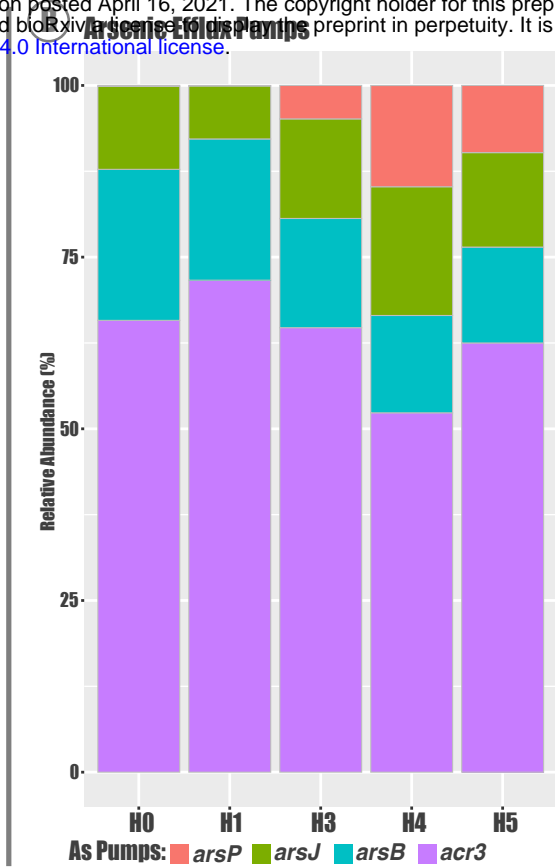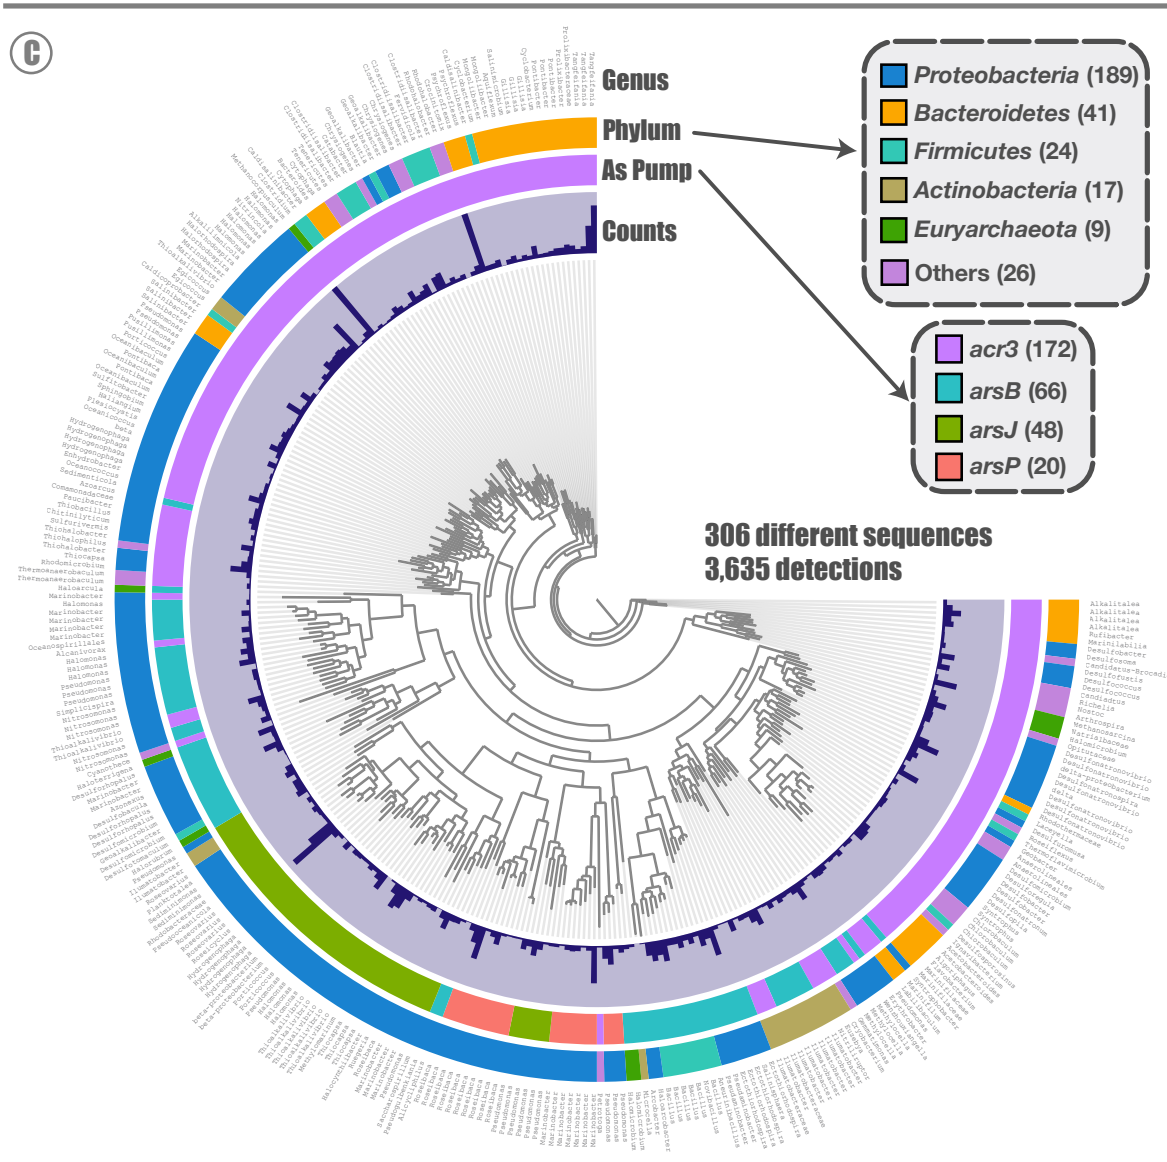

**(B)**

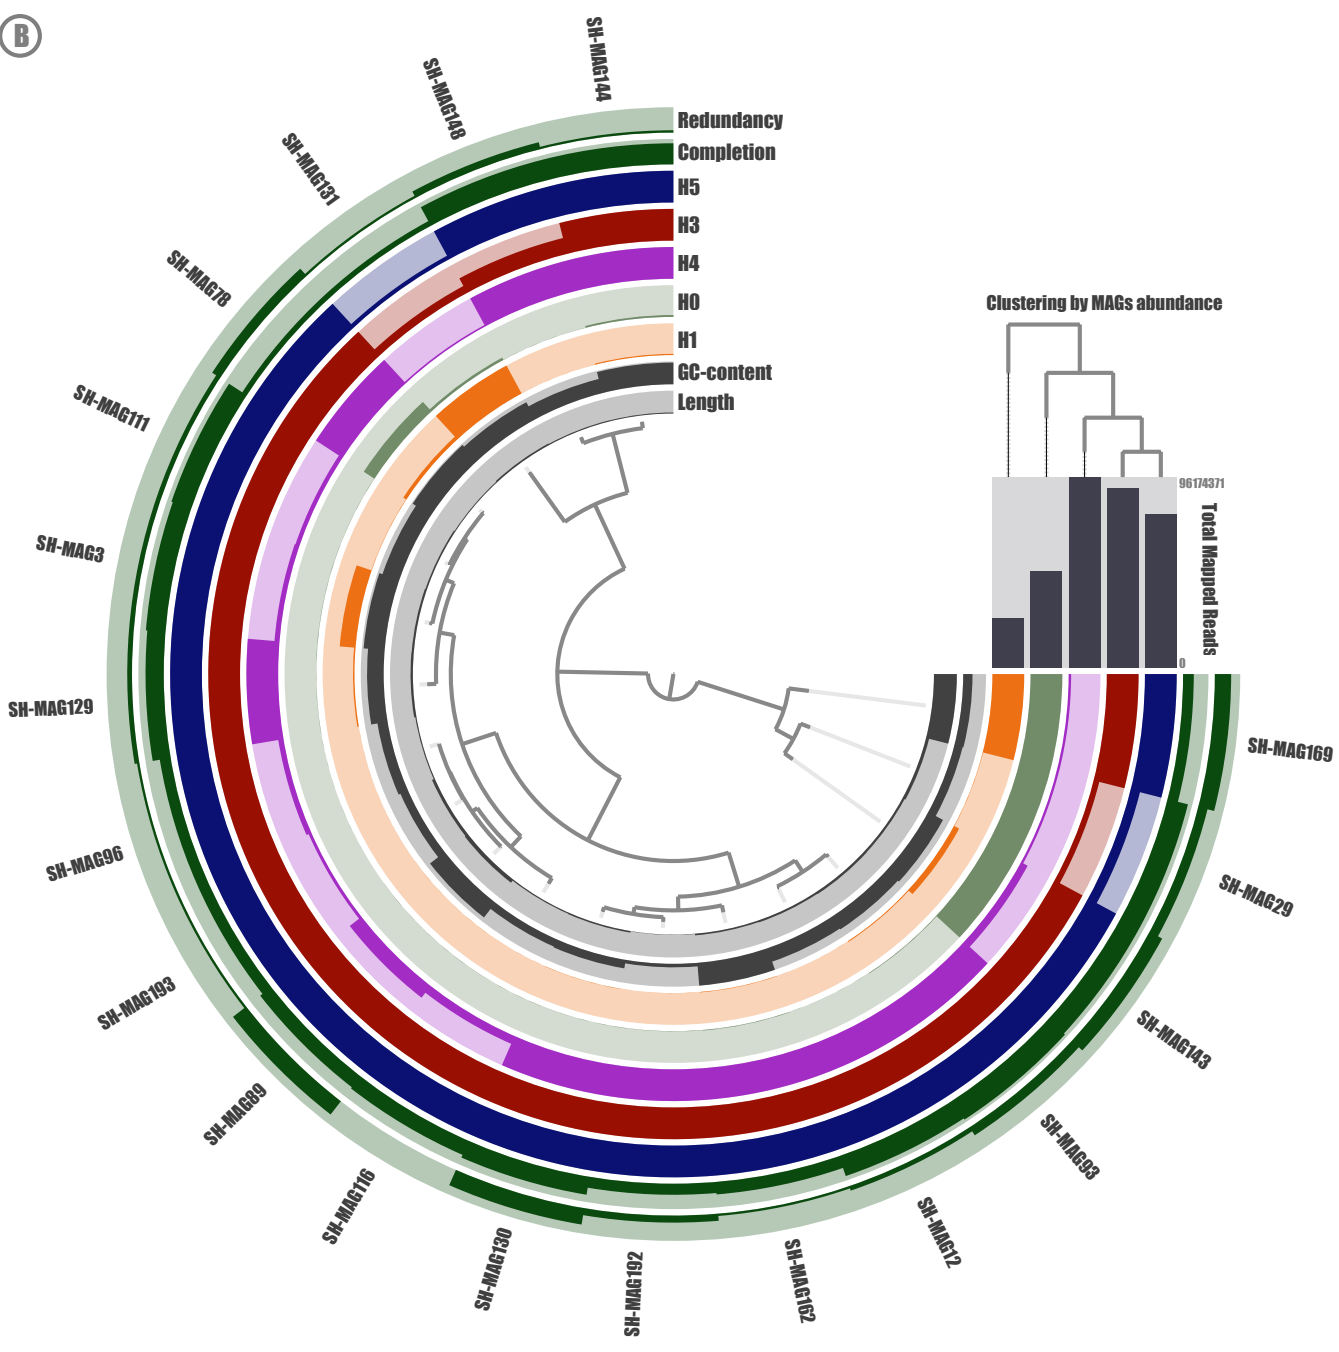

|                | Percent Completion | Percent Redundancy | Num Contigs | N50    | GC content | Percent Completion | Percent Contamination | Phylum          | Class               | Order                 | Family                 | Genus            |
|----------------|--------------------|--------------------|-------------|--------|------------|--------------------|-----------------------|-----------------|---------------------|-----------------------|------------------------|------------------|
| * SH-MAG111    | 95.77%             | 2.82%              | 332         | 11,127 | 60.76%     | 81.95%             | 1.54%                 | Bacteroidota    | ---                 | ---                   | ---                    | ---              |
| * SH-MAG116    | 90.14%             | 0.00%              | 208         | 14,823 | 43.49%     | 83.04%             | 0.00%                 | Bacteroidota    | Bacteroidia         | Chitinophagales       | Saprosiraceae          | ---              |
| * ** SH-MAG12  | 95.77%             | 2.82%              | 413         | 11,471 | 54.64%     | 92.06%             | 3.28%                 | Bacteroidota    | ---                 | ---                   | ---                    | ---              |
| * SH-MAG130    | 92.96%             | 9.86%              | 395         | 10,529 | 44.80%     | 93.50%             | 11.30%                | Bacteroidota    | Bacteroidia         | Bacteroidales         | ---                    | ---              |
| SH-MAG192      | 85.92%             | 4.23%              | 314         | 4,317  | 36.06%     | 68.88%             | 4.52%                 | Bacteroidota    | Ignavibacteria      | Ignavibacteriales     | Melioribacteraceae     | ---              |
| ** SH-MAG193   | 85.92%             | 1.41%              | 561         | 10,013 | 44.34%     | 92.35%             | 3.33%                 | Bacteroidota    | Bacteroidia         | Cytophagales          | Cyclobacteriaceae      | ---              |
| SH-MAG96       | 85.92%             | 1.41%              | 234         | 14,512 | 47.74%     | 80.17%             | 1.49%                 | Bacteroidota    | Bacteroidia         | Chitinophagales       | Saprosiraceae          | ---              |
| * ** SH-MAG29  | 95.77%             | 5.63%              | 346         | 20,718 | 44.60%     | 97.71%             | 0.66%                 | Cyanobacteria   | Cyanobacteriia      | Cyanobacteriales      | Phormidiaceae          | Arthrospira      |
| * SH-MAG3      | 94.37%             | 2.82%              | 436         | 10,739 | 66.26%     | 86.11%             | 6.17%                 | Gemmatimonadota | Gemmatimonadetes    | ---                   | ---                    | ---              |
| SH-MAG89       | 88.73%             | 9.86%              | 498         | 14,477 | 62.15%     | 82.81%             | 4.83%                 | Proteobacteria  | Deltaproteobacteria | Bradymonadales        | ---                    | ---              |
| SH-MAG131      | 80.28%             | 1.41%              | 626         | 5,244  | 63.23%     | 77.20%             | 5.18%                 | Proteobacteria  | Deltaproteobacteria | Desulfobacterales     | Desulfosarcinaceae     | ---              |
| * SH-MAG143    | 95.77%             | 8.45%              | 601         | 7,367  | 58.76%     | 84.68%             | 2.47%                 | Proteobacteria  | Deltaproteobacteria | Desulfobacterales     | Desulfosarcinaceae     | Desulfatitaley   |
| SH-MAG148      | 95.77%             | 4.23%              | 384         | 7,277  | 55.17%     | 87.42%             | 0.86%                 | Proteobacteria  | Deltaproteobacteria | Desulfobacterales     | ---                    | ---              |
| * ** SH-MAG93  | 97.18%             | 5.63%              | 550         | 9,043  | 56.28%     | 94.35%             | 3.10%                 | Proteobacteria  | Deltaproteobacteria | Desulfobacterales     | Desulfosarcinaceae     | Desulfosarcina   |
| * ** SH-MAG129 | 92.96%             | 2.82%              | 390         | 14,010 | 58.58%     | 91.11%             | 3.40%                 | Proteobacteria  | Gammaproteobacteria | ---                   | ---                    | ---              |
| * SH-MAG144    | 95.77%             | 1.41%              | 315         | 8,476  | 67.34%     | 87.51%             | 1.67%                 | Proteobacteria  | Gammaproteobacteria | Ectothiorhodospirales | Thioalkalivibrionaceae | Thioalkalivibrio |
| SH-MAG162      | 87.32%             | 1.41%              | 431         | 8,147  | 69.40%     | 81.81%             | 3.19%                 | Proteobacteria  | Gammaproteobacteria | Pseudomonadales       | ---                    | ---              |
| SH-MAG78       | 80.28%             | 5.63%              | 371         | 6,424  | 67.34%     | 73.01%             | 2.21%                 | Proteobacteria  | Gammaproteobacteria | ---                   | ---                    | ---              |
| SH-MAG169      | 85.54%             | 9.64%              | 4176        | 8,047  | 42.02%     | 72.44%             | 39.84%                | ---             | ---                 | ---                   | ---                    | ---              |

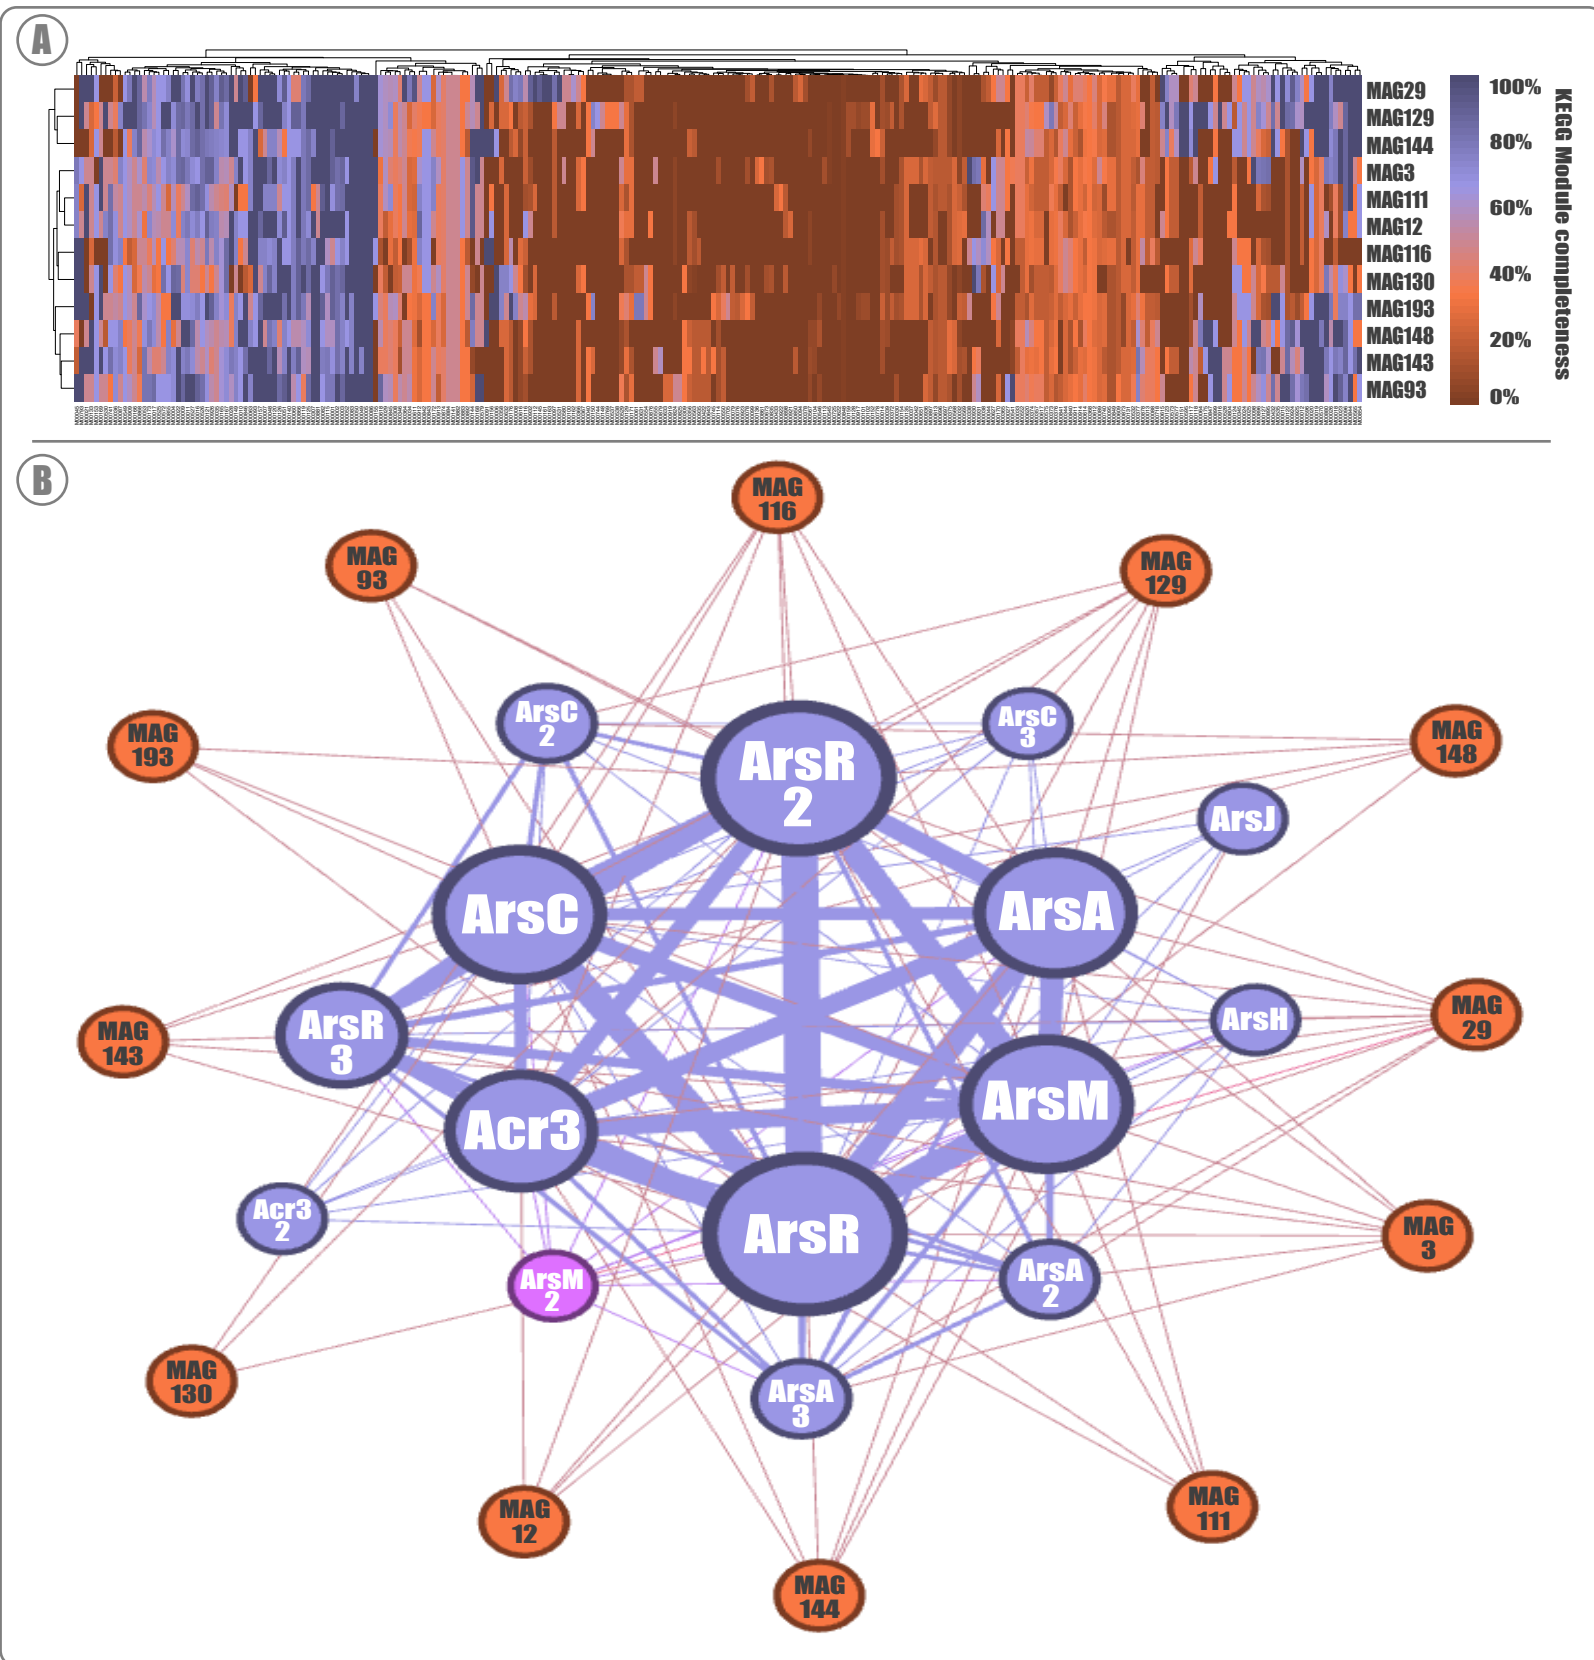

Source: http://biorxiv.org/content/10.1101/2021.04.13.439755v1.full.pdf
